# Supplementary material
Source: publisher figshare collection journal article supplement (https://tandf.figshare.com/ndownloader/files/18666629)

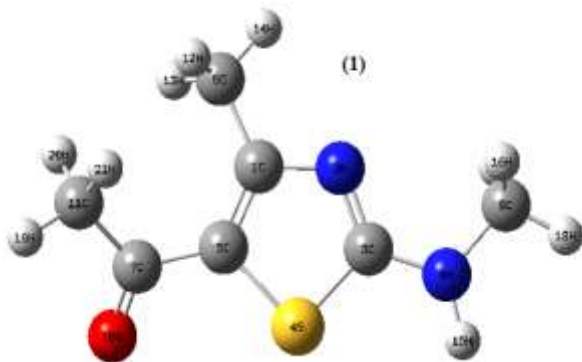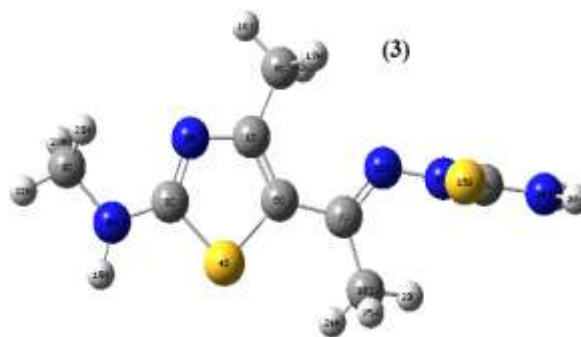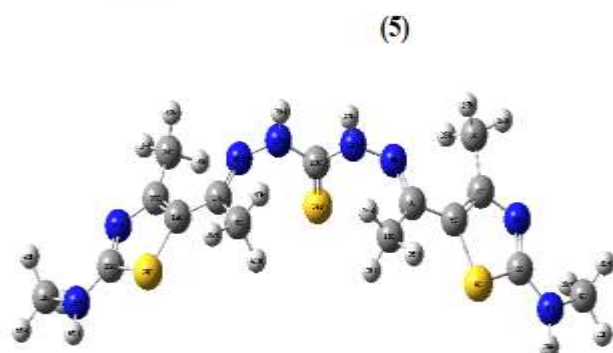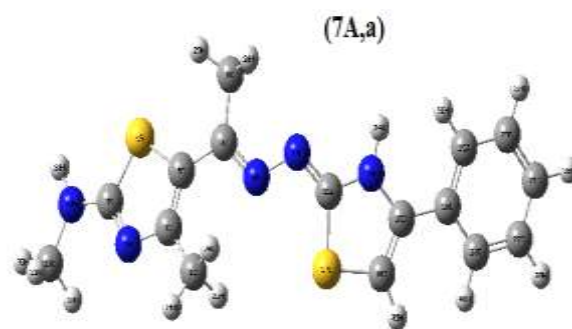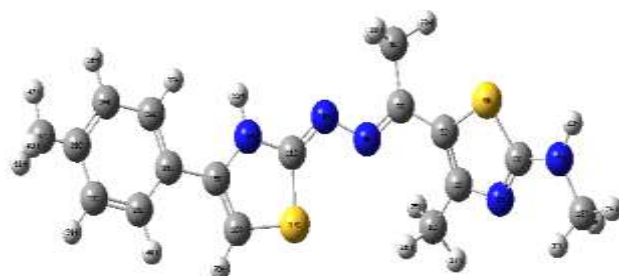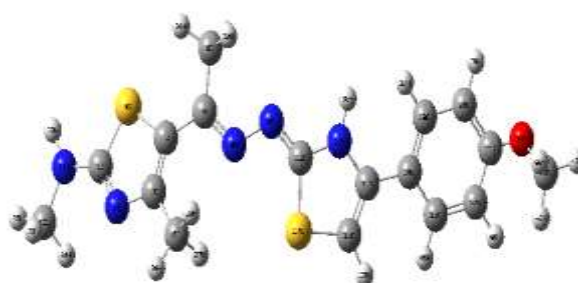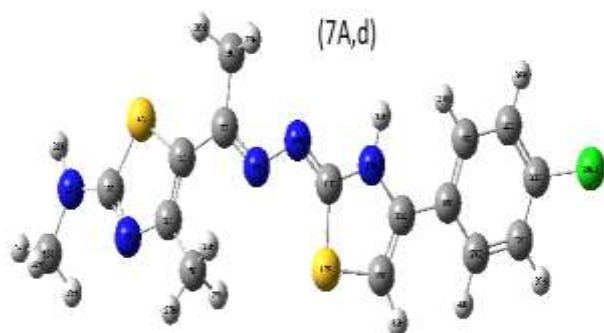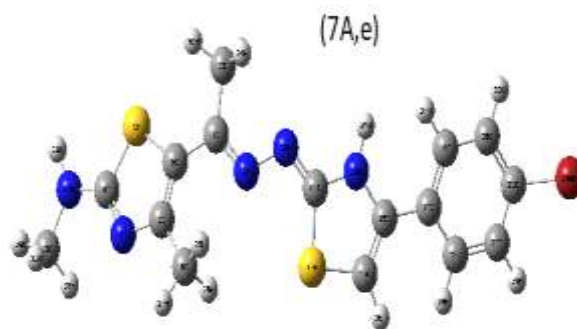

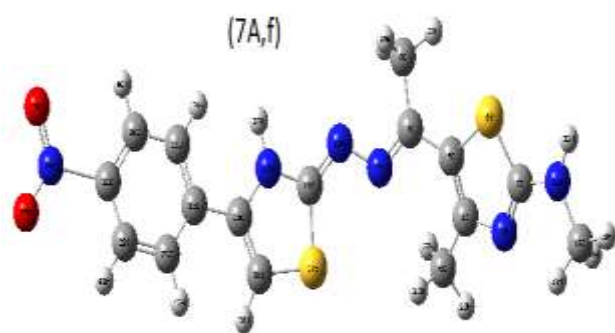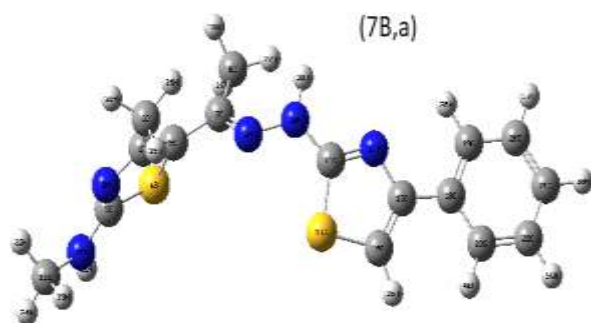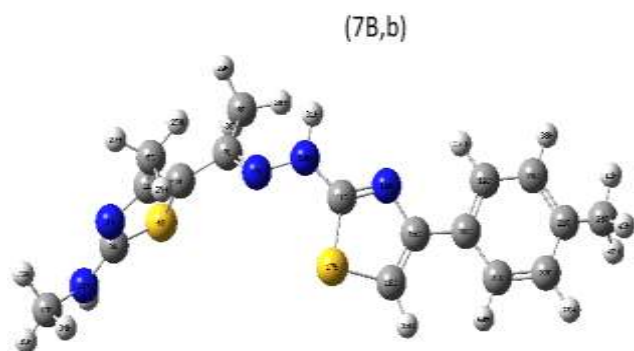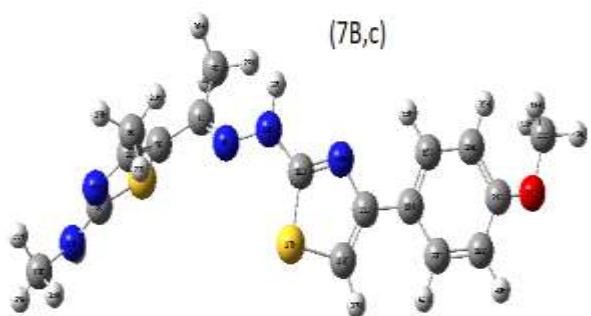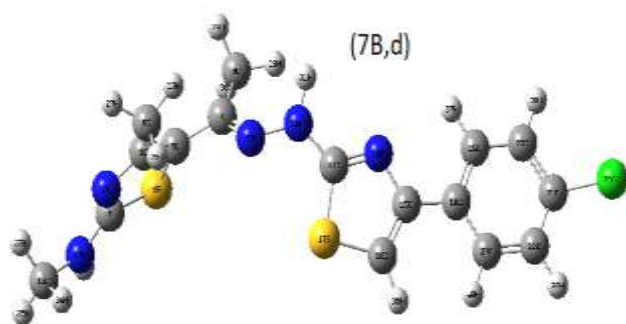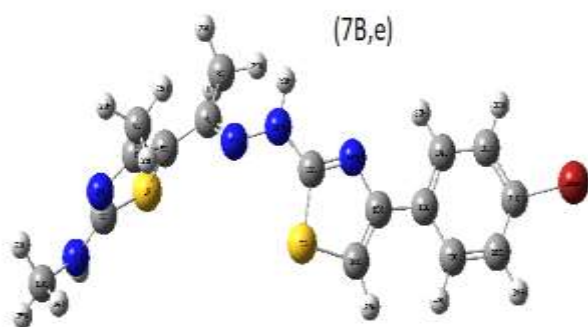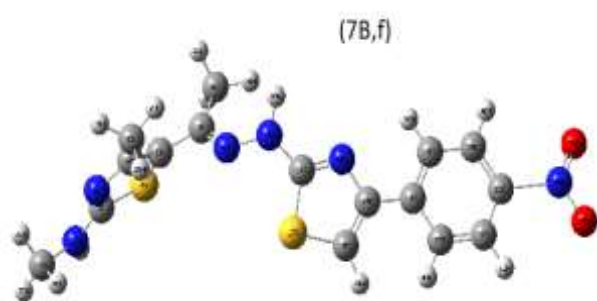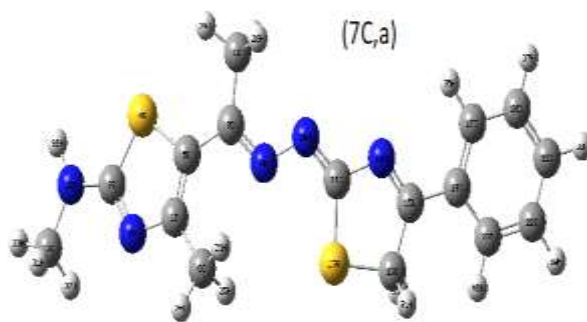

(7C,b)

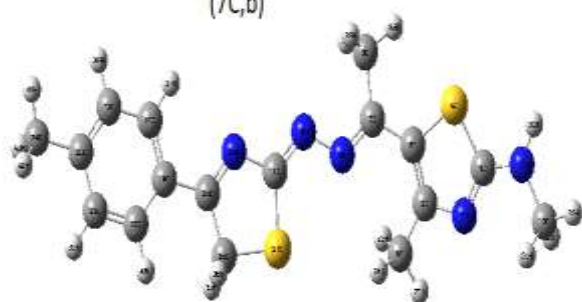

(7C,c)

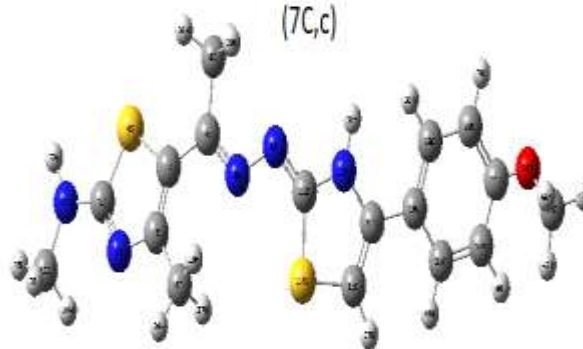

(7C,d)

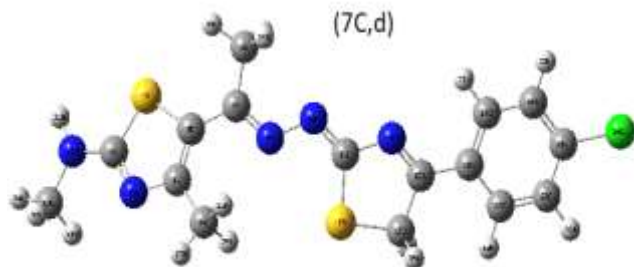

(7C,e)

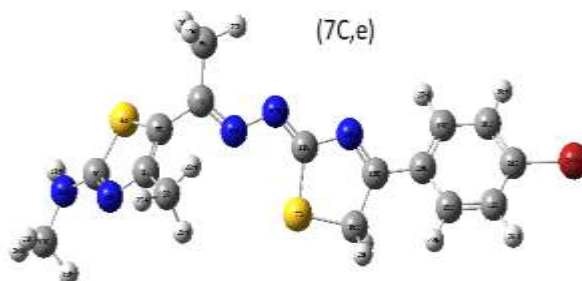

(7C,f)

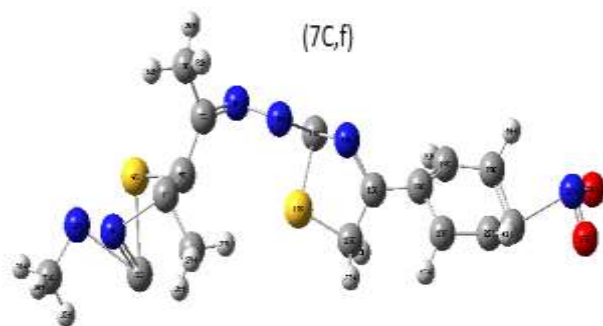

(9a)

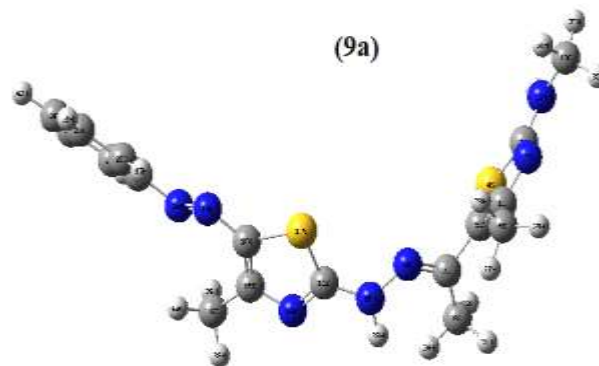

(9b)

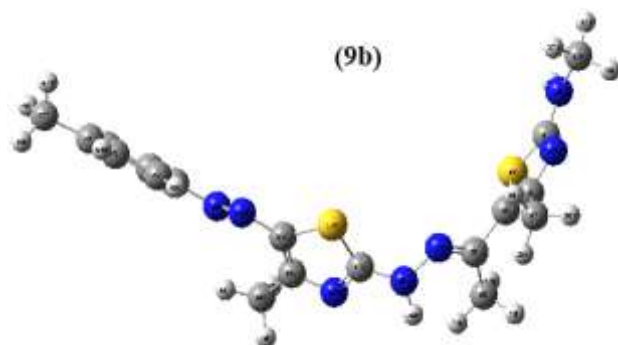

(9c)

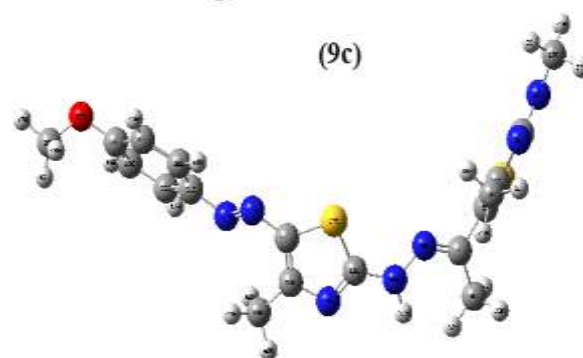

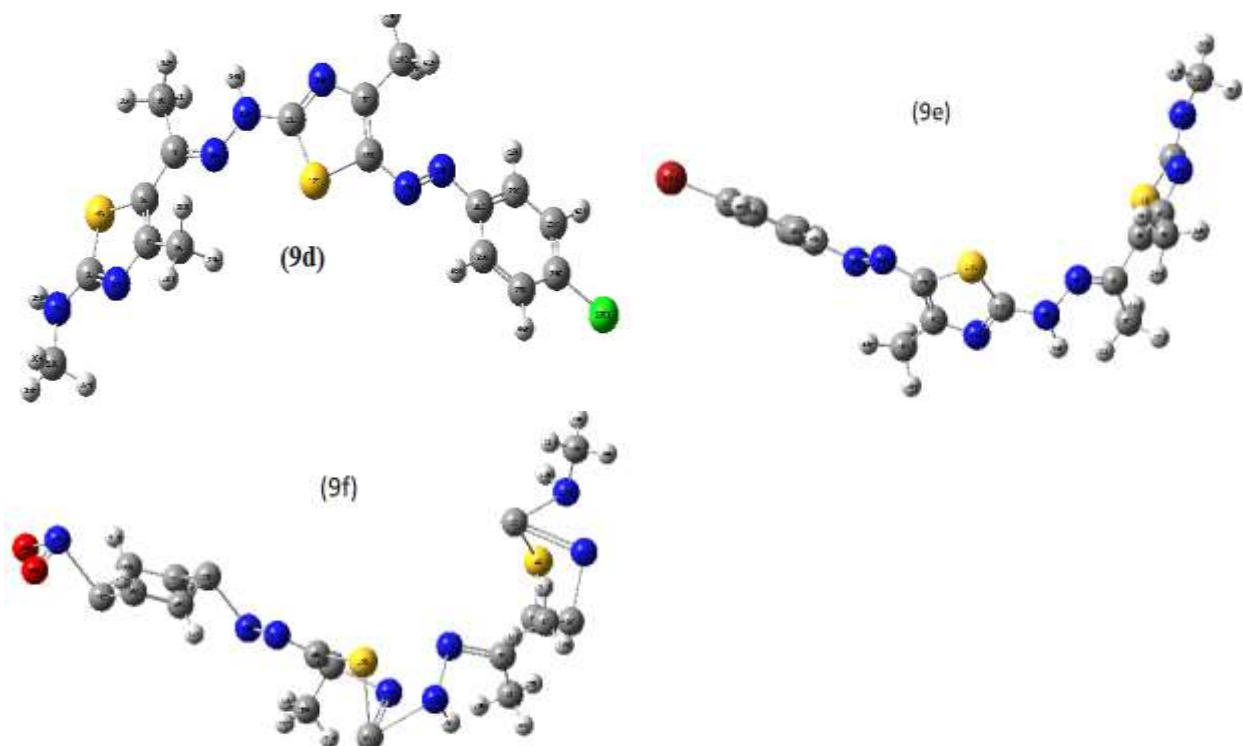

**Fig. 1S.** Optimized structures of dithiazole synthesis & conformers

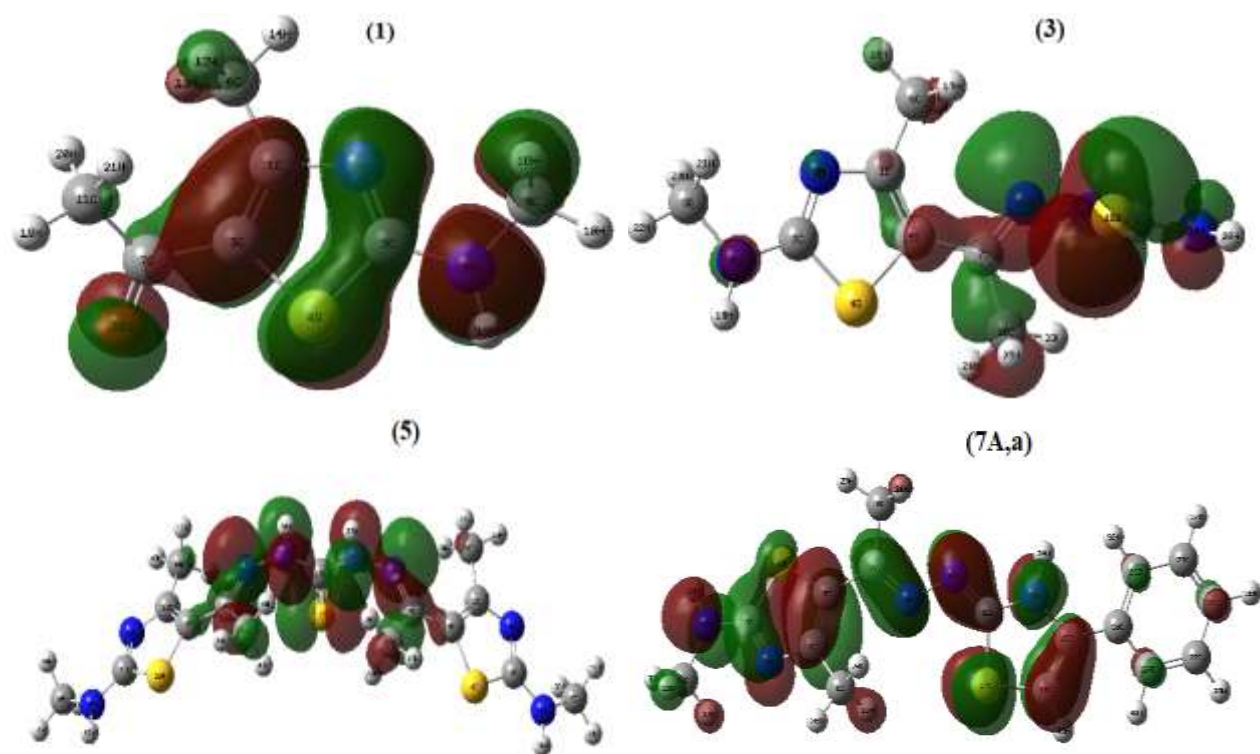



(7A,b)

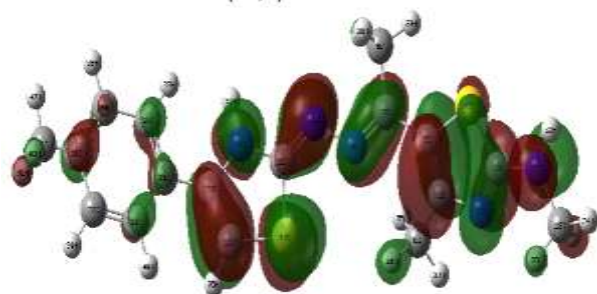

(7A,c)

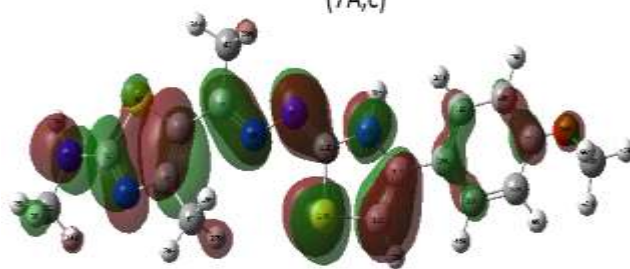

(7A,d)

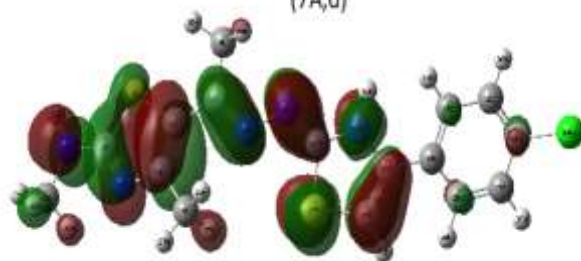

(7A,e)

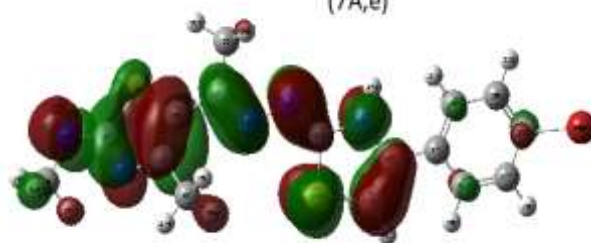

(7A,f)

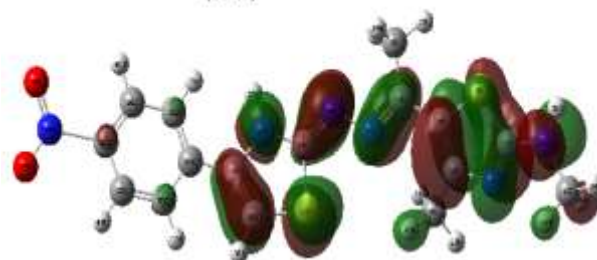

(7B,a)

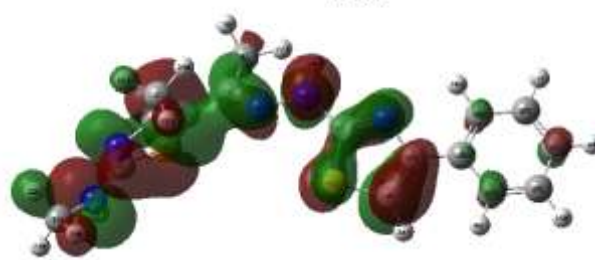

(7B,b)

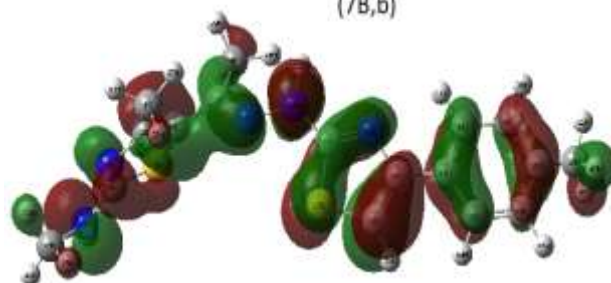

(7B,c)

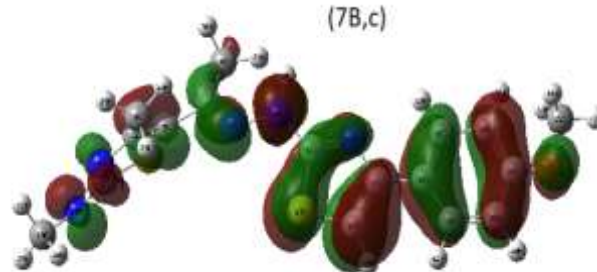

(7B,d)

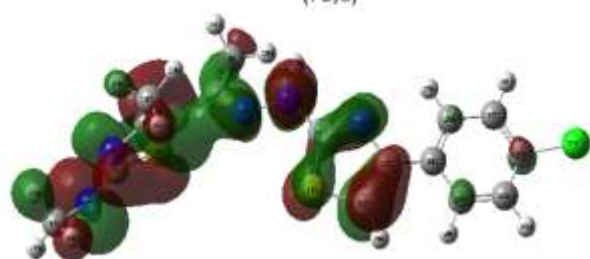

(7B,e)

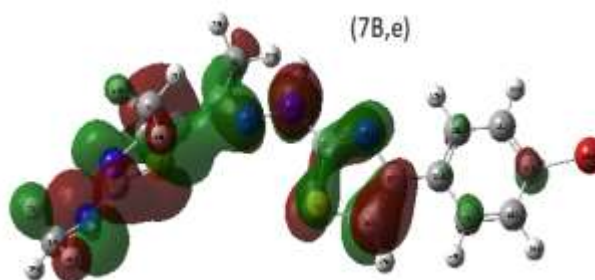

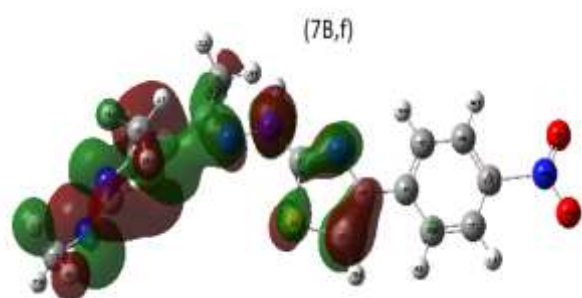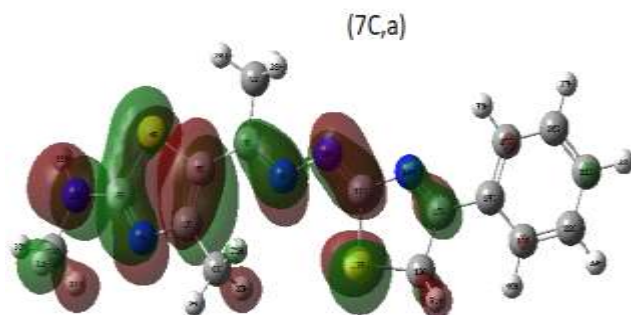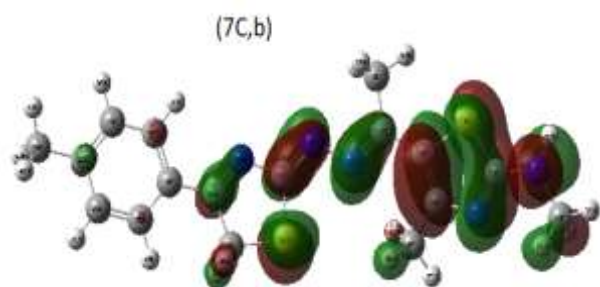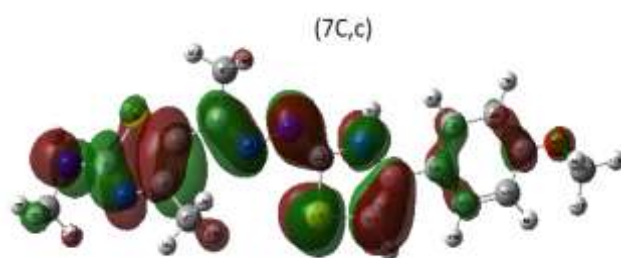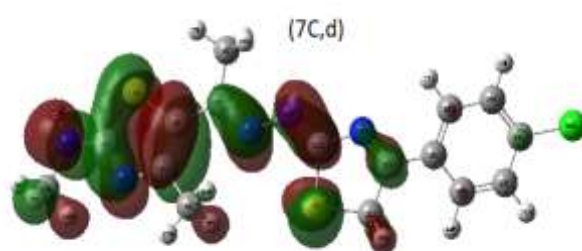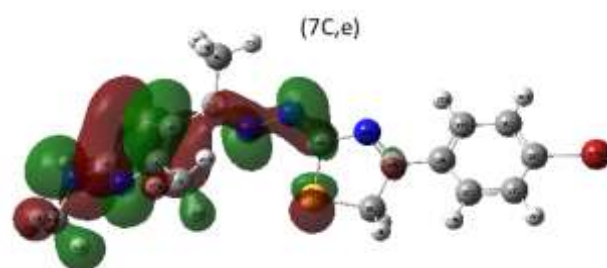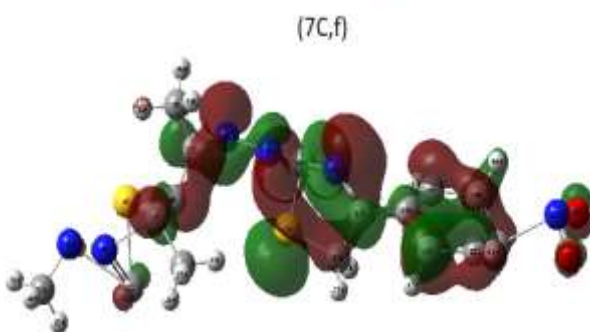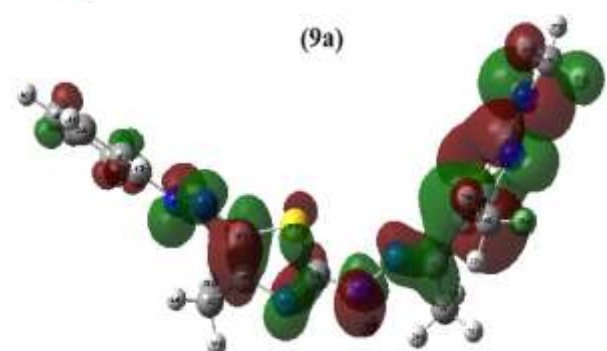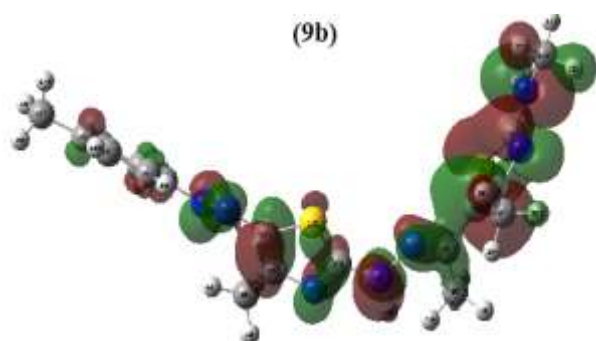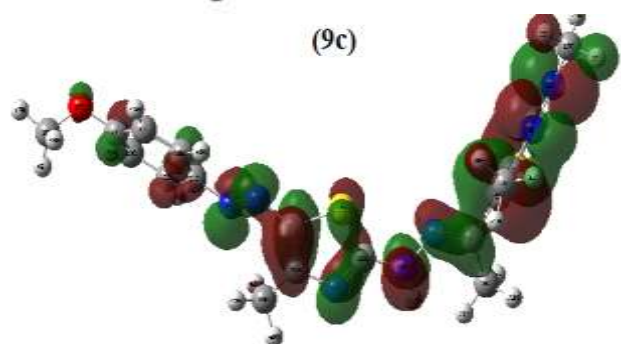

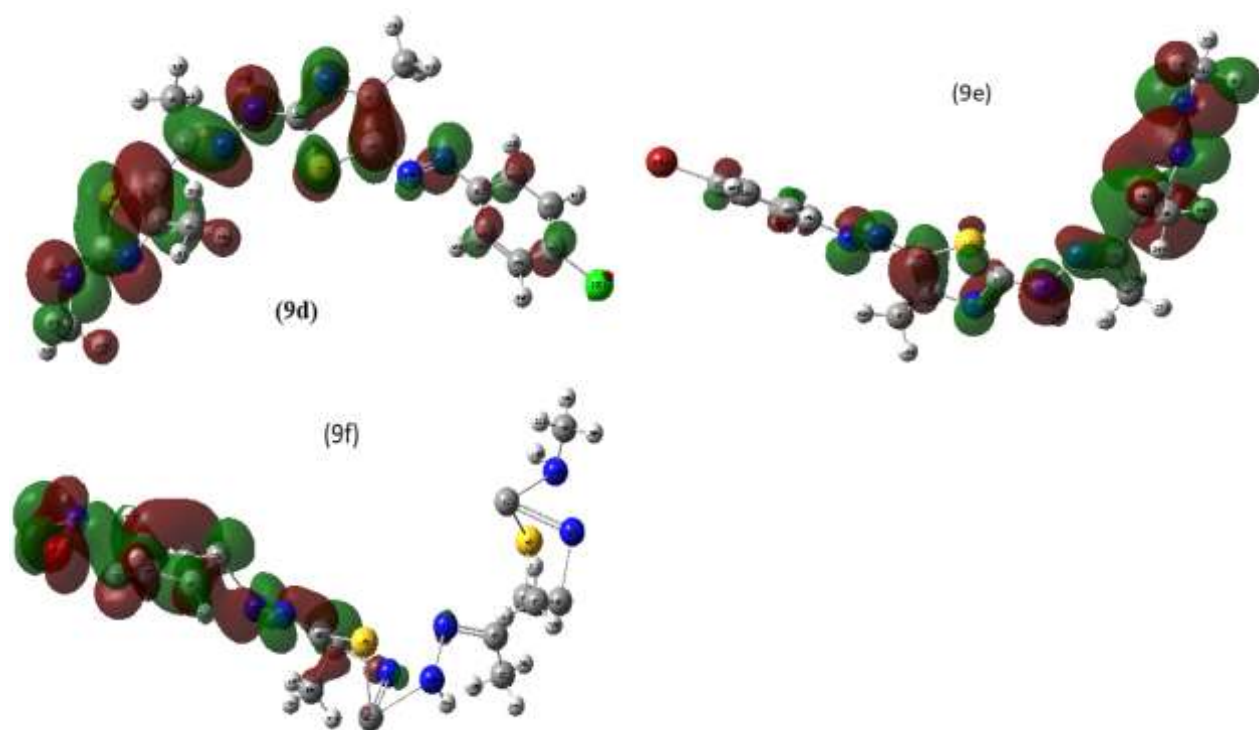

**Fig. 2S.** HOMO images of dithiazole synthesis & conformers

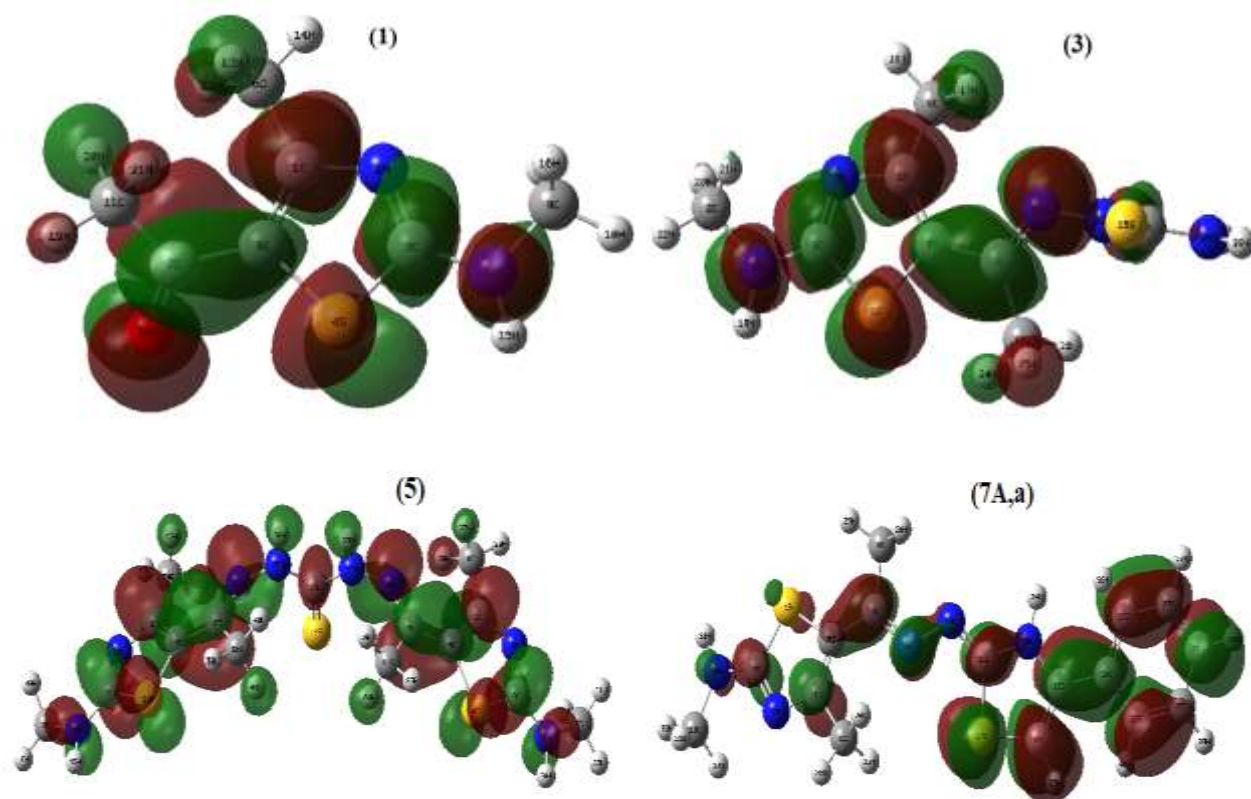



(7A,b)

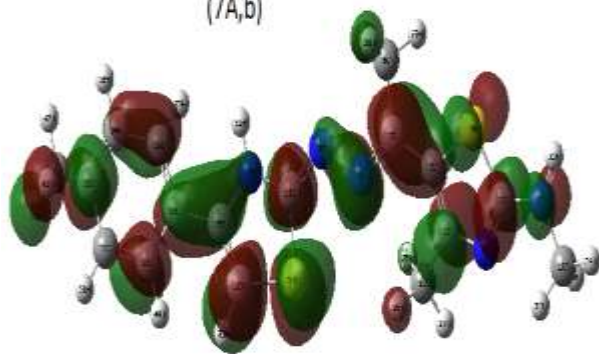

(7A,c)

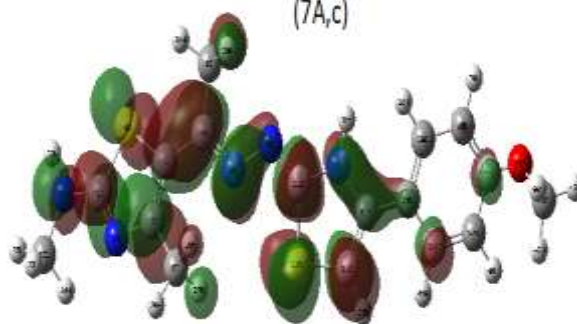

(7A,d)

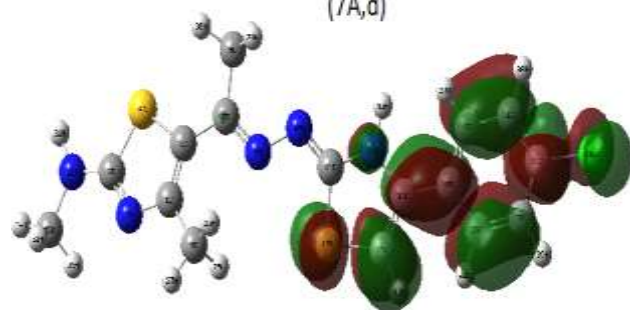

(7A,e)

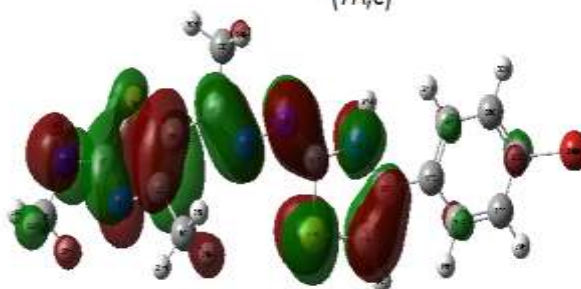

(7A,f)

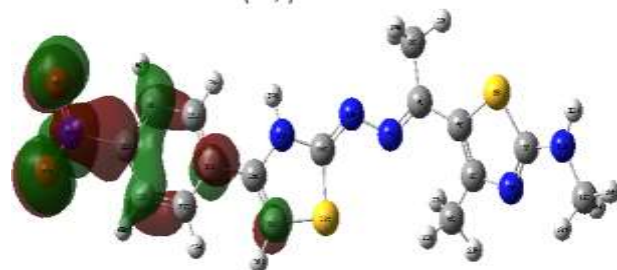

(7B,a)

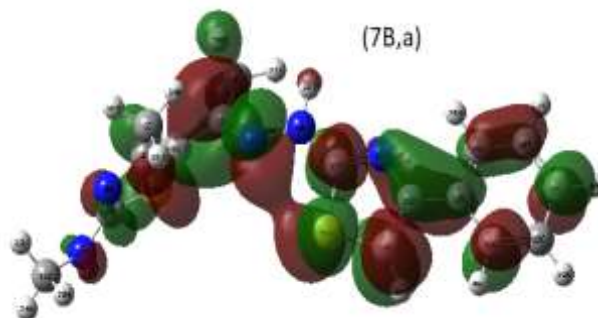

(7B,b)

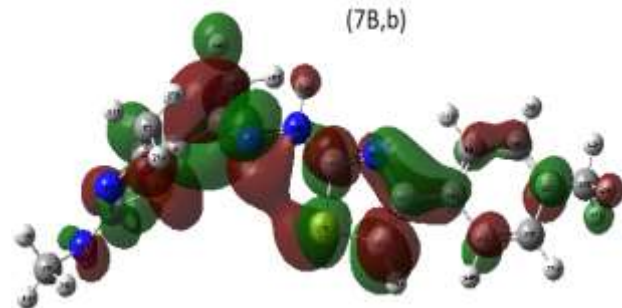

(7B,c)

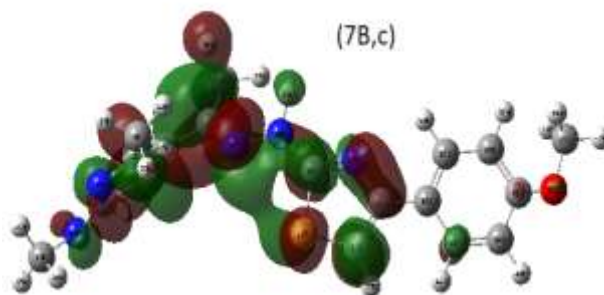



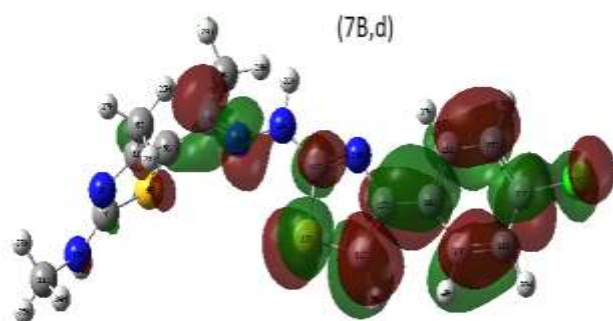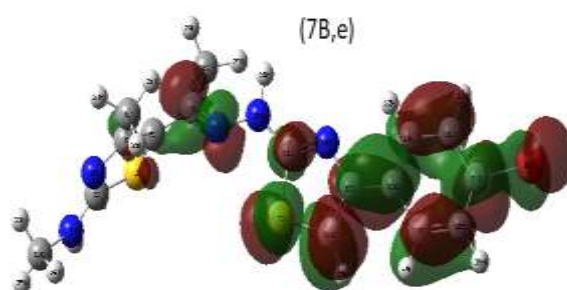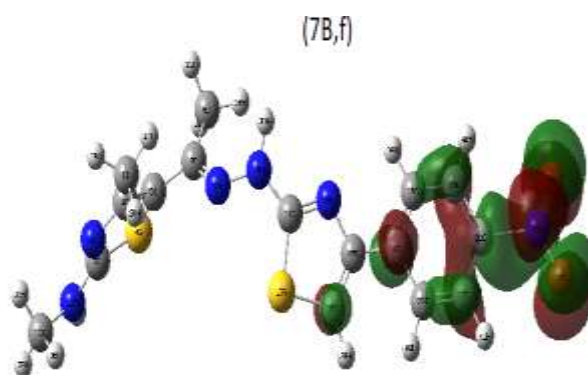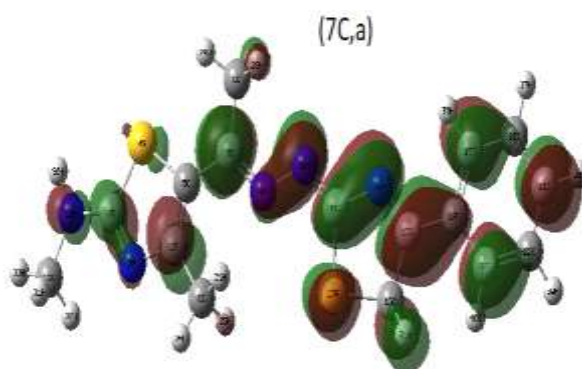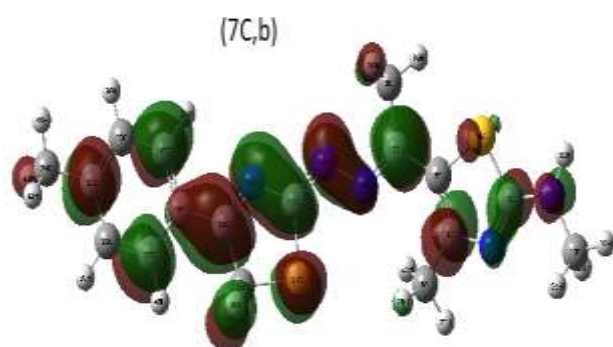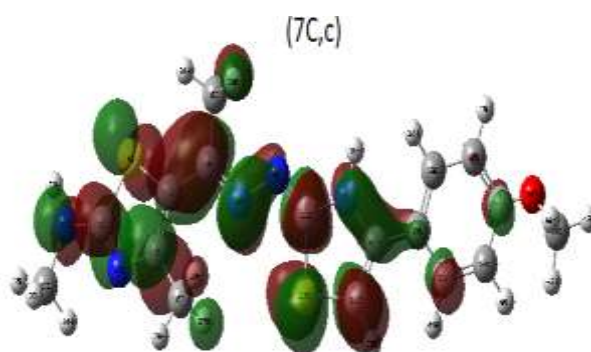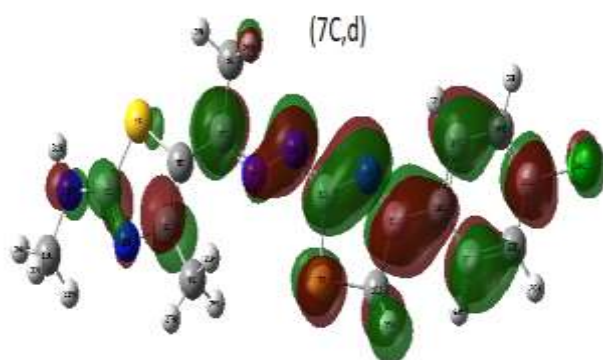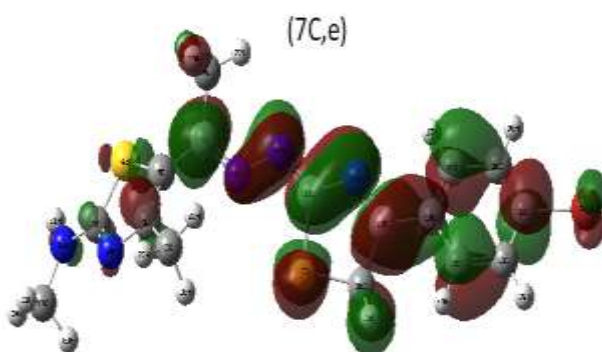

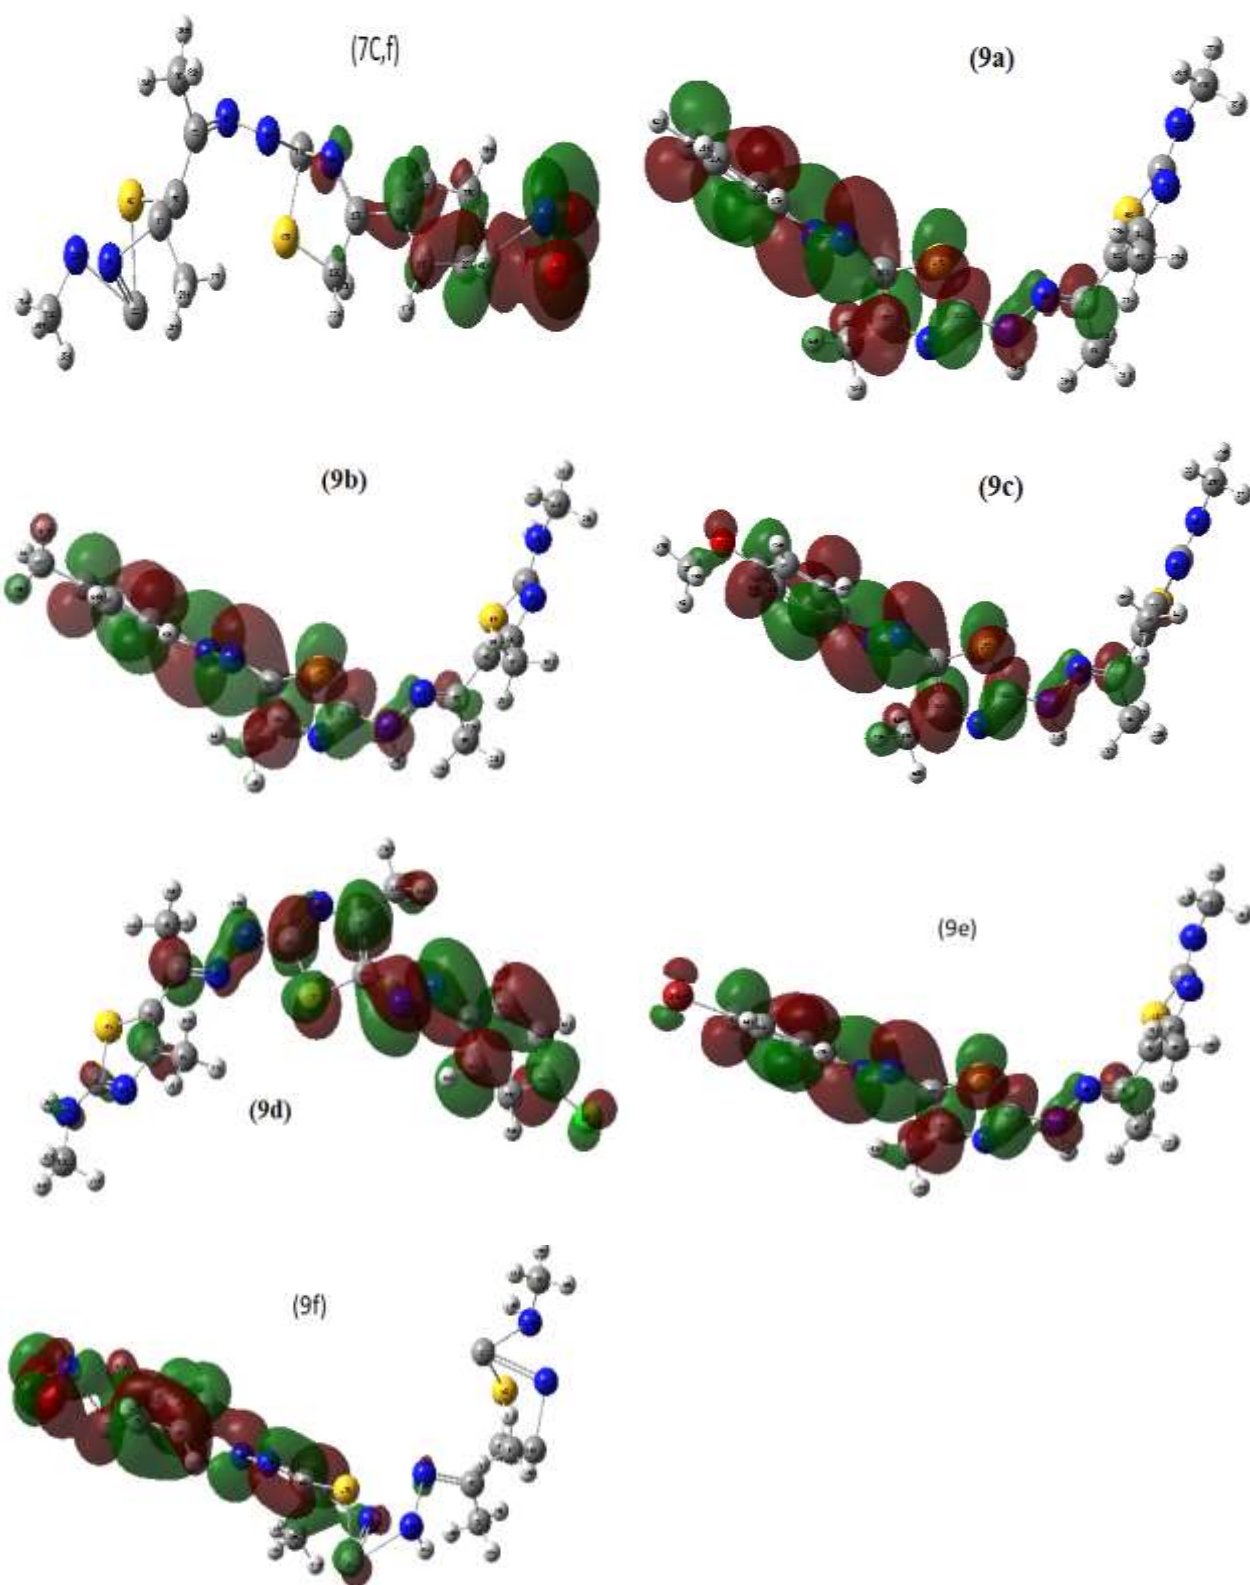

**Fig. 3S.** LUMO images of dithiazole synthesis & conformers

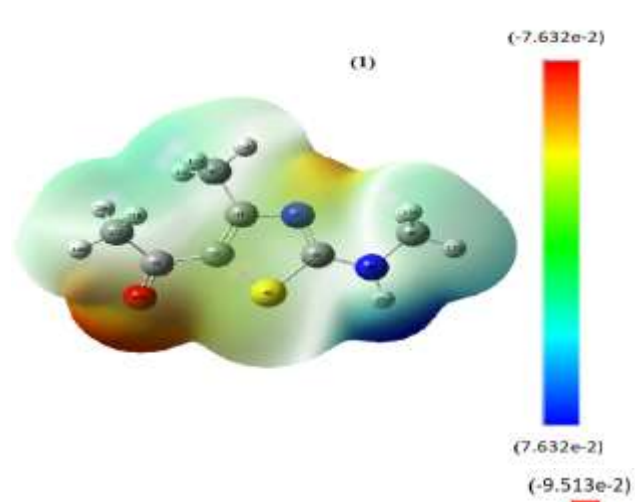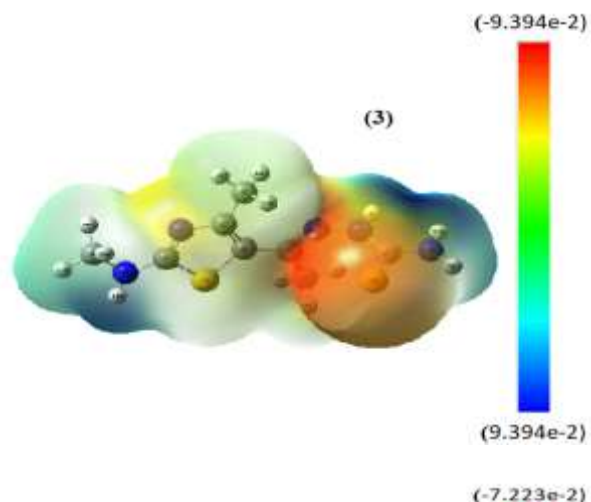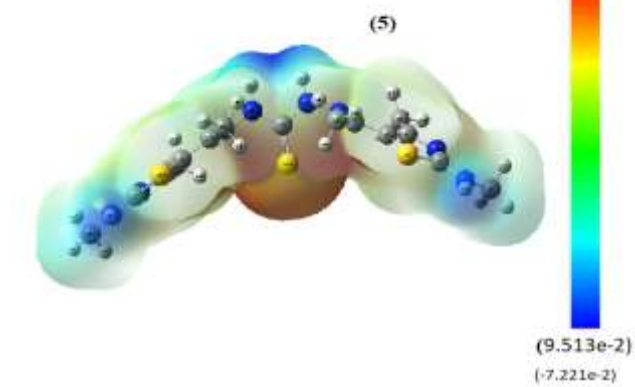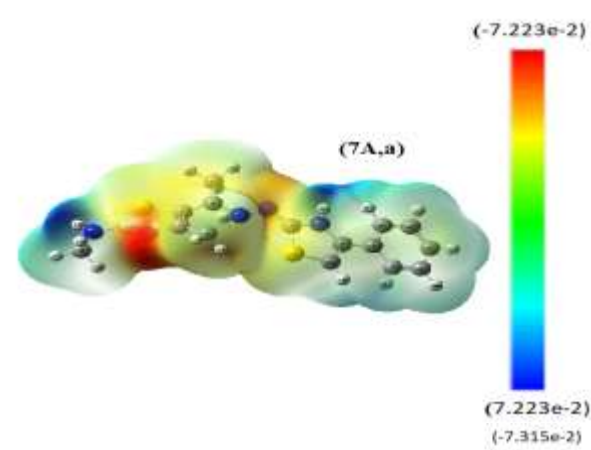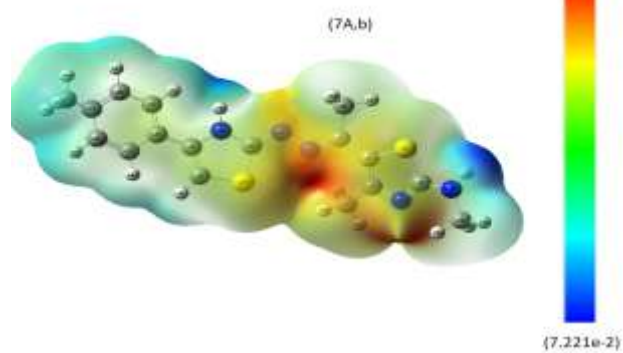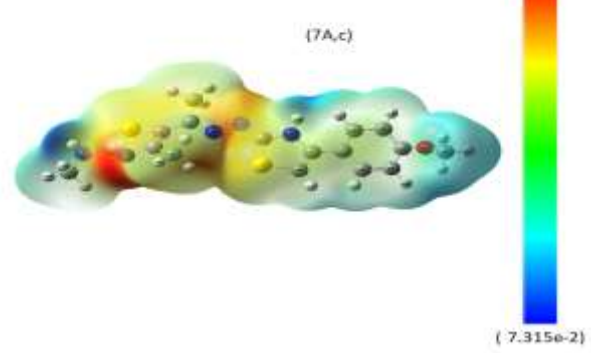



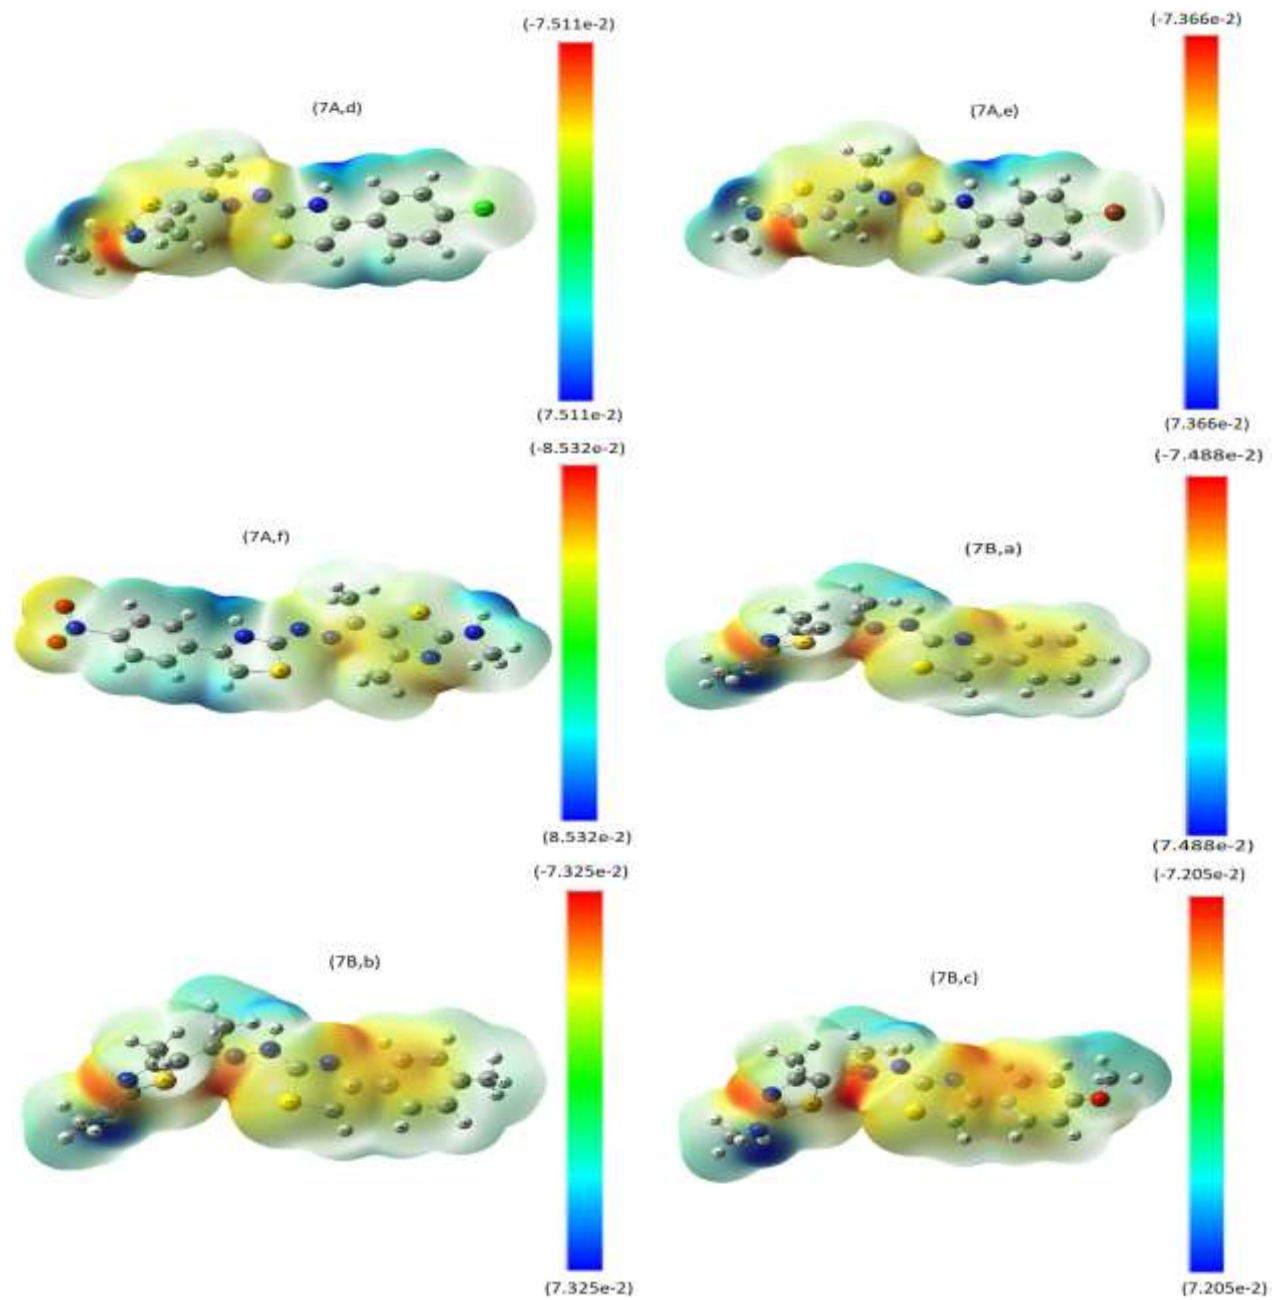

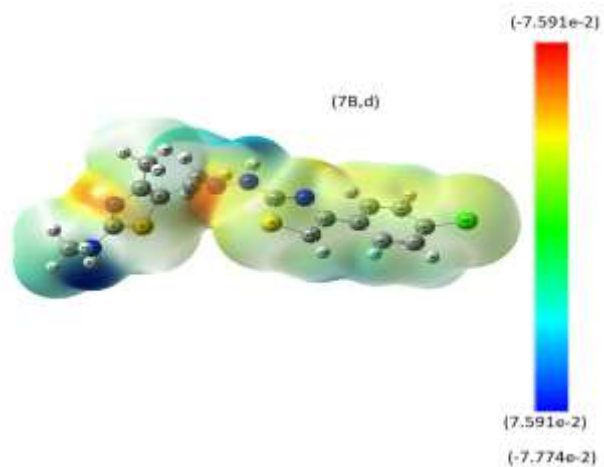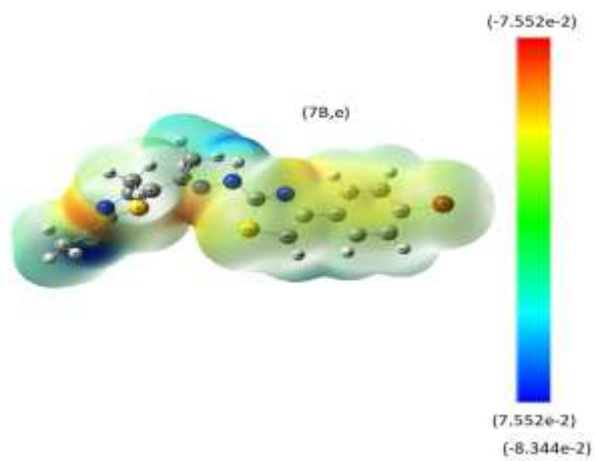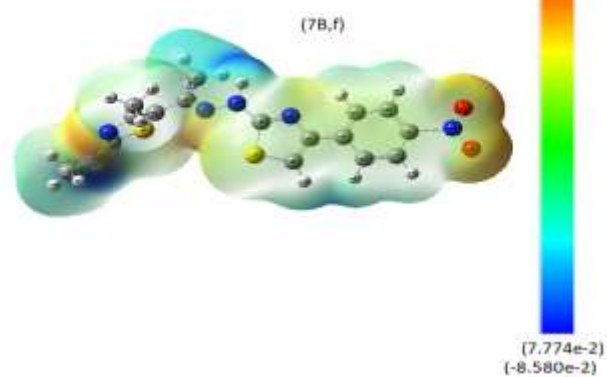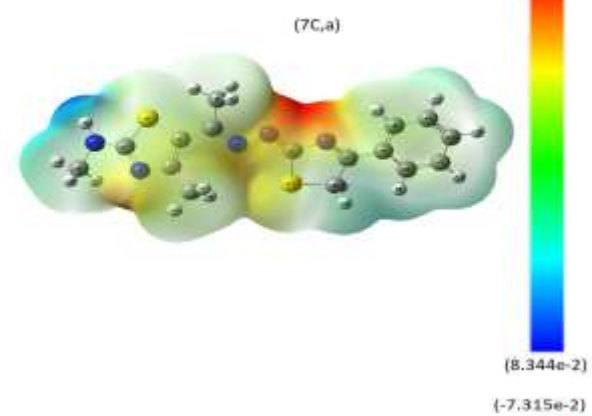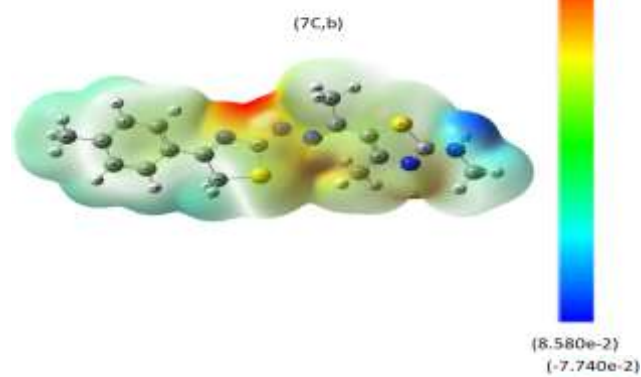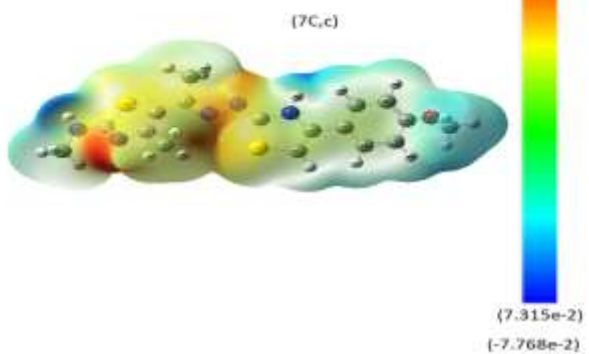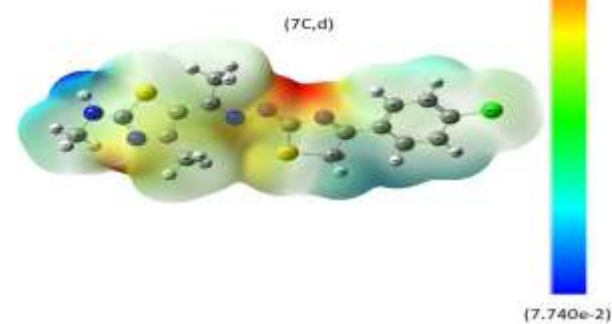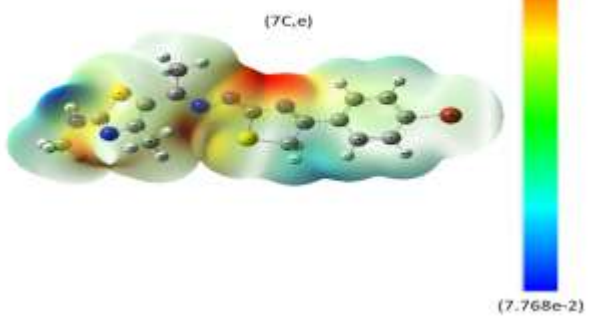

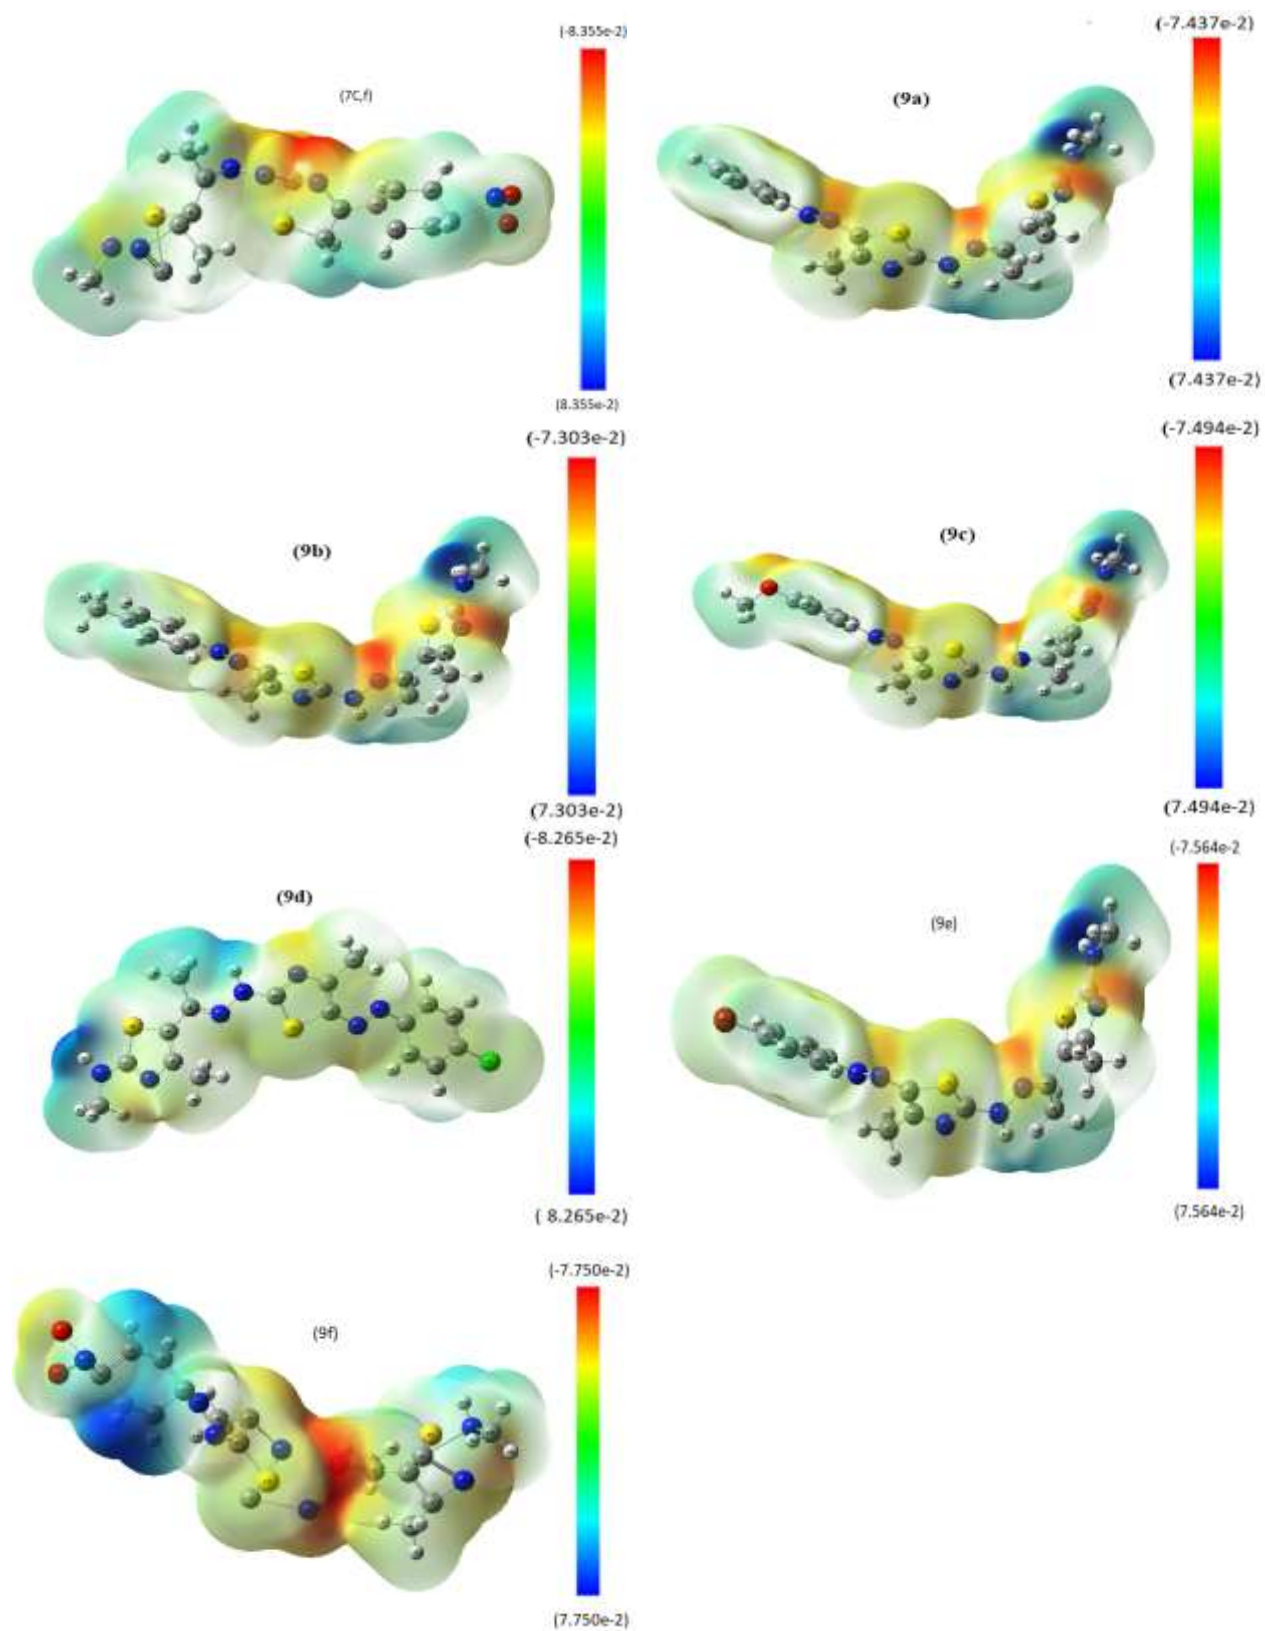

**Fig. 4S.** Electrostatic maps of dithiazole compounds & conformers



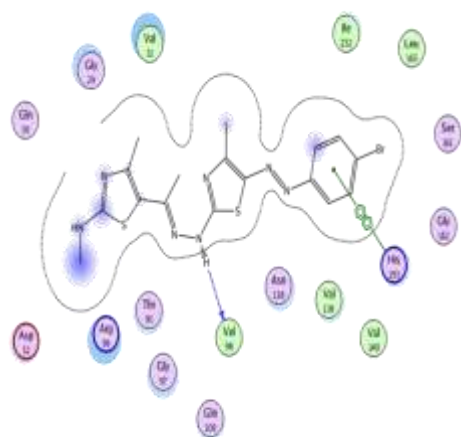

**A**

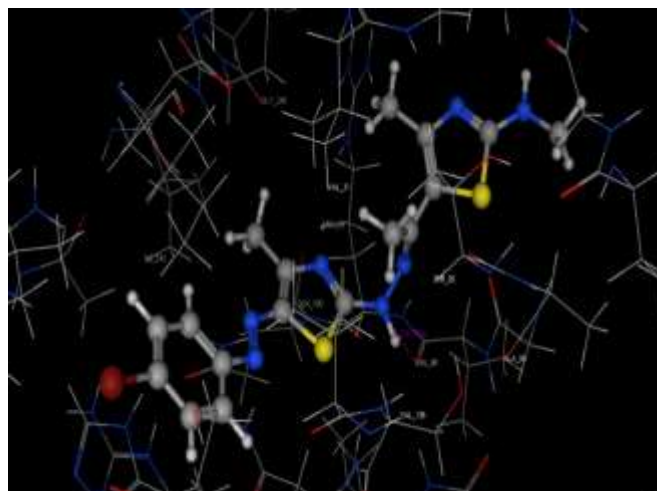

**B**

**Figure 5S:** The proposed binding mode of the **9e** docked in the active site of LDH-5; A and B showing 2D and 3D ligand-receptor interactions

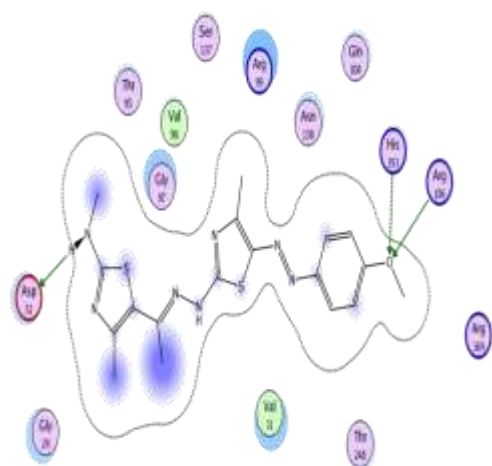

**A**

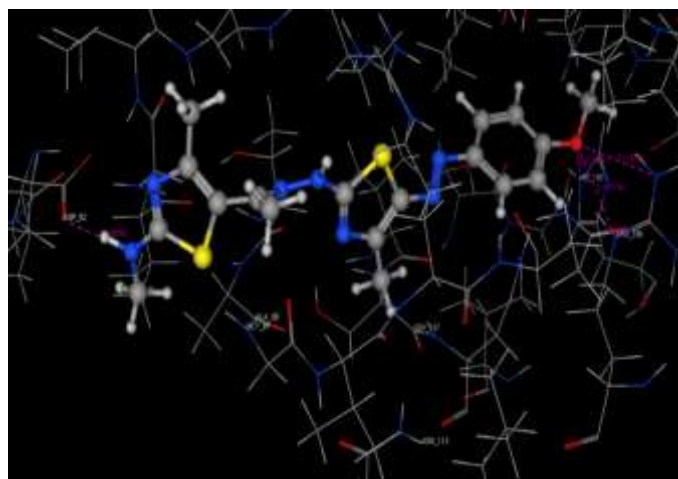

**B**

**Figure 6S:** The proposed binding mode of the **9c** docked in the active site of LDH-5; A and B showing 2D and 3D ligand-receptor interactions

# Peak Find - Memory-90

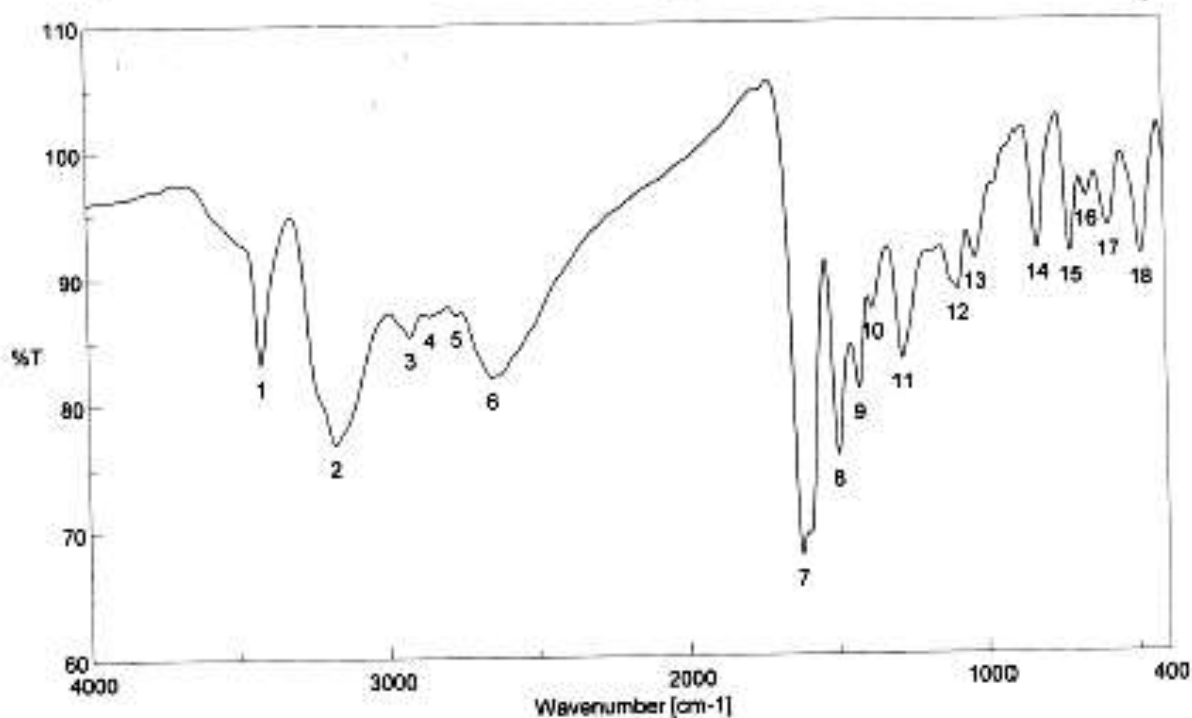

[Comments]  
Sample name  
Comment  
User  
Division  
Company

**compound 3**

6/2018  
IR  
IR  
MAC

## [ Result of Peak Picking ]

| No. | Position | Intensity | No. | Position | Intensity | No. | Position | Intensity |
|-----|----------|-----------|-----|----------|-----------|-----|----------|-----------|
| 1   | 3423.03  | 83.2412   | 2   | 3177.15  | 76.85     | 3   | 2925.48  | 85.3475   |
| 4   | 2859.92  | 86.9167   | 5   | 2770.24  | 87.0068   | 8   | 2650.68  | 82.0628   |
| 7   | 1620.88  | 67.8441   | 8   | 1495.53  | 75.6668   | 9   | 1424.17  | 80.6497   |
| 10  | 1377.89  | 87.2187   | 11  | 1278.54  | 83.2181   | 12  | 1080.55  | 88.6135   |
| 13  | 1030.77  | 91.0792   | 14  | 829.241  | 91.7458   | 15  | 716.425  | 91.4859   |
| 16  | 662.428  | 95.8982   | 17  | 588.182  | 93.4936   | 18  | 479.224  | 91.2237   |

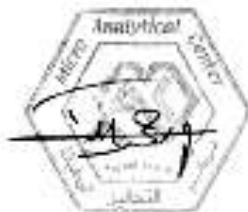

# Peak Find - Memory-86

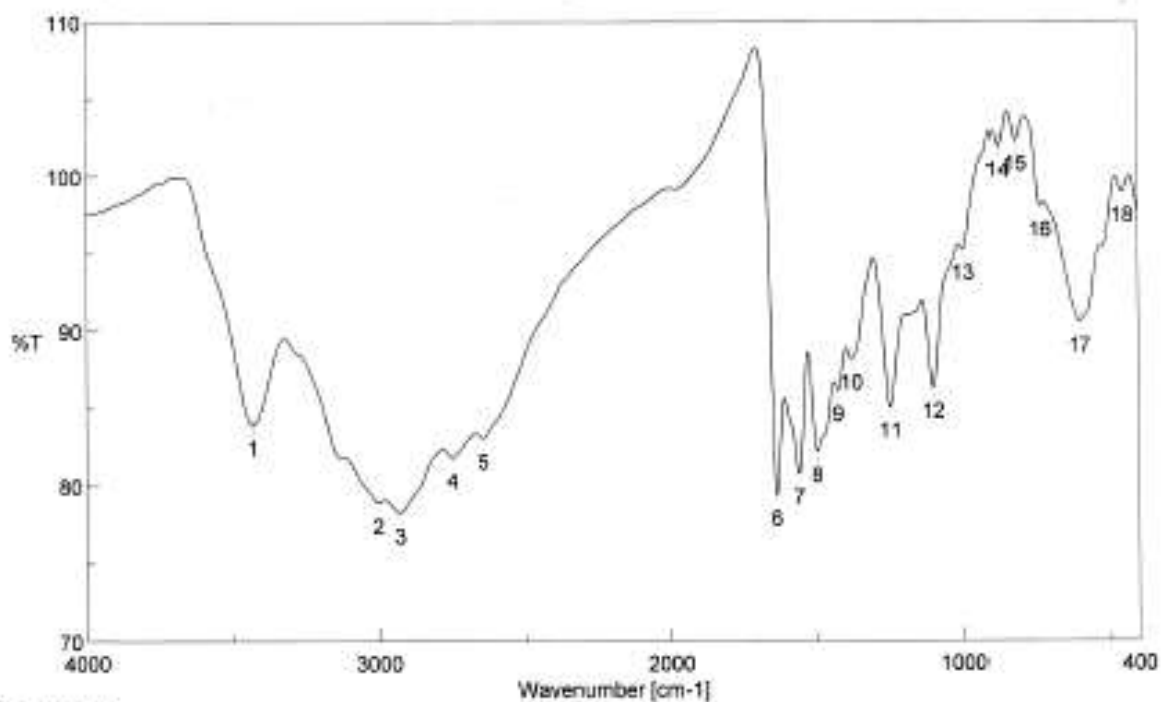

[Comments]  
Sample name  
Comment  
User  
Division  
Company

## Compound 5

6/2018  
IR  
IR  
MAC

### [ Result of Peak Picking ]

| No. | Position | Intensity | No. | Position | Intensity | No. | Position | Intensity |
|-----|----------|-----------|-----|----------|-----------|-----|----------|-----------|
| 1   | 3428.81  | 83.928    | 2   | 3001.66  | 78.9073   | 3   | 2927.41  | 78.2705   |
| 4   | 2748.07  | 81.8189   | 5   | 2643.93  | 83.0612   | 6   | 1636.3   | 79.3552   |
| 7   | 1580.13  | 80.756    | 8   | 1496.42  | 82.1682   | 9   | 1426.1   | 86.1045   |
| 10  | 1380.78  | 88.143    | 11  | 1248.68  | 85.0351   | 12  | 1100.19  | 86.2835   |
| 13  | 996.053  | 95.2217   | 14  | 878.417  | 101.882   | 15  | 821.527  | 102.286   |
| 16  | 735.71   | 97.997    | 17  | 602.646  | 90.5132   | 18  | 452.225  | 98.9232   |

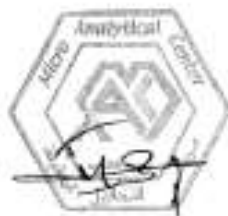



# Compound 5

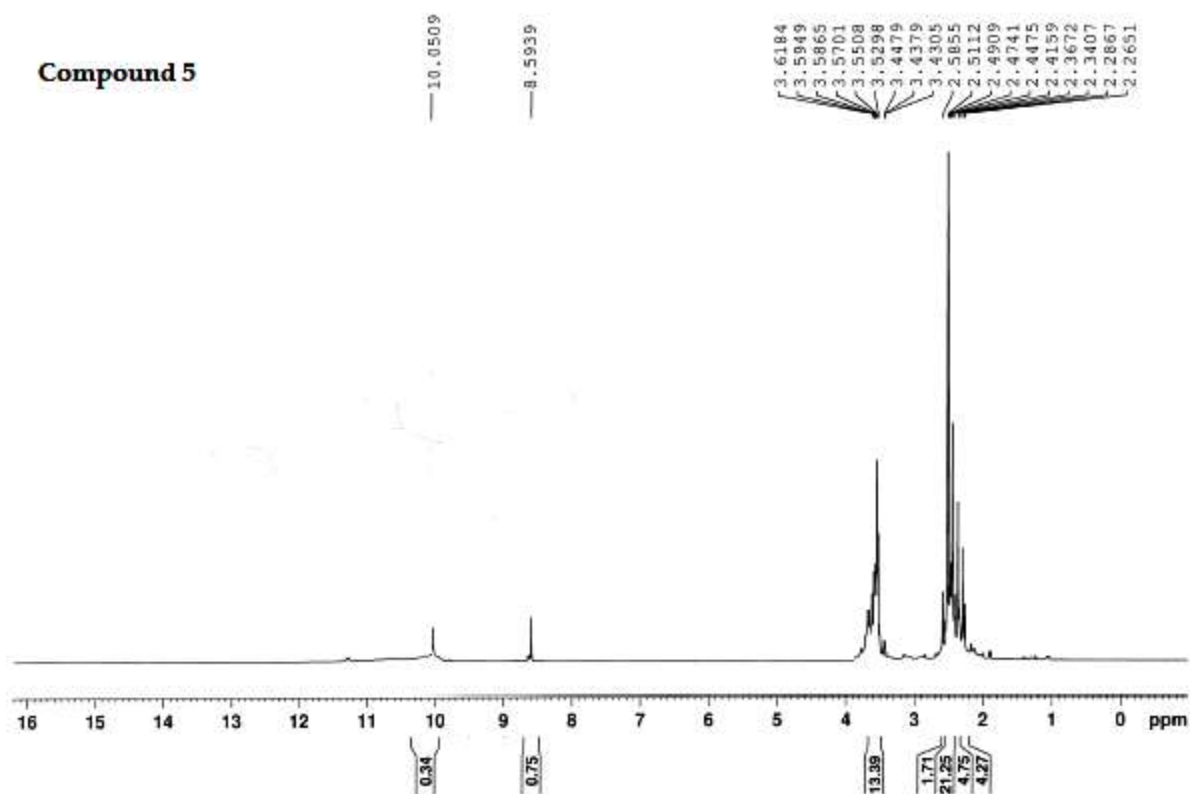

# Peak Find - Memory-114

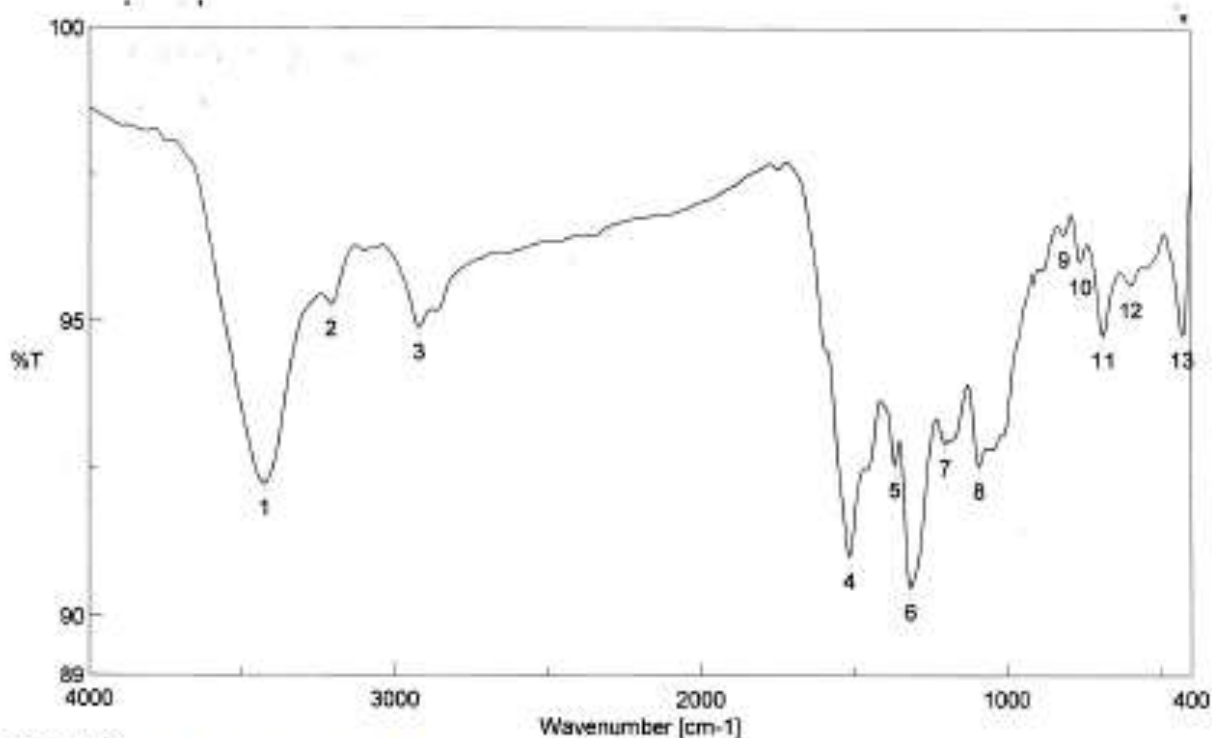

[Comments]  
Sample name  
Comment  
User  
Division  
Company

## Compound 7a

6/2018  
IR  
IR  
MAC

### [ Result of Peak Picking ]

| No. | Position | Intensity | No. | Position | Intensity | No. | Position | Intensity |
|-----|----------|-----------|-----|----------|-----------|-----|----------|-----------|
| 1   | 3424.96  | 92.2504   | 2   | 3208     | 95.2979   | 3   | 2920.86  | 94.9039   |
| 4   | 1514.81  | 91.0268   | 5   | 1386.32  | 92.5672   | 6   | 1316.18  | 90.4977   |
| 7   | 1202.4   | 92.9342   | 8   | 1090.55  | 92.5501   | 9   | 818.634  | 96.484    |
| 10  | 762.709  | 98.0171   | 11  | 688.463  | 94.7678   | 12  | 597.825  | 95.6226   |
| 13  | 429.084  | 94.7818   |     |          |           |     |          |           |

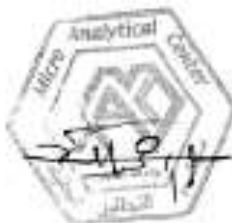

Compound 7b

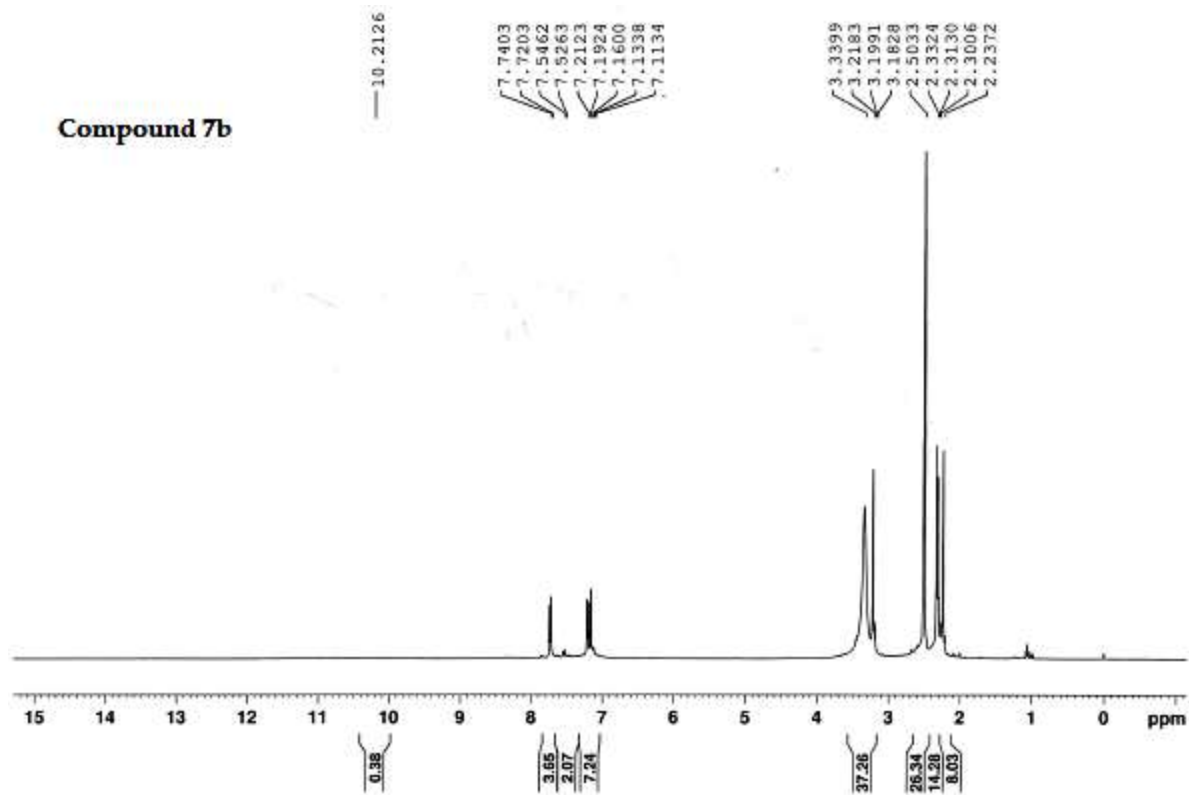



# Peak Find - Memory-77

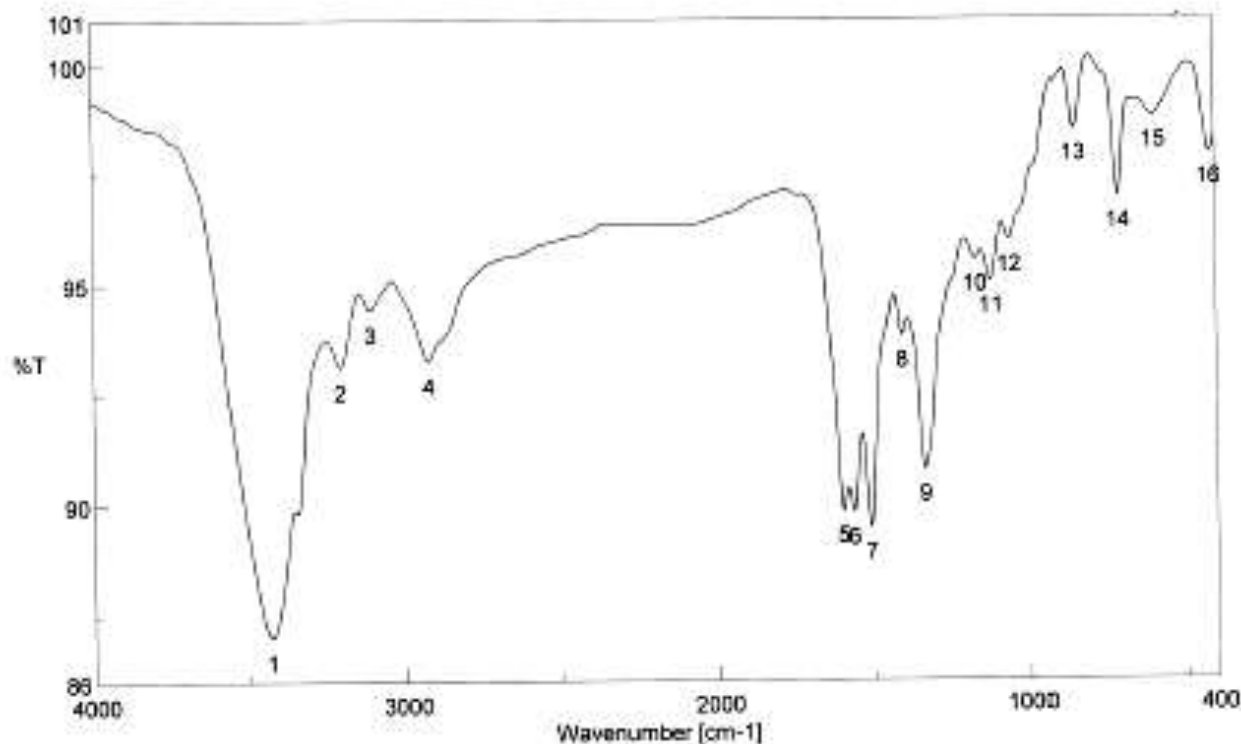

[Comments]  
Sample name  
Comment  
User  
Division  
Company

## Compound 7c

6/2018  
IR  
IR  
MAC

### [ Result of Peak Picking ]

| No. | Position | Intensity |
|-----|----------|-----------|
| 1   | 3431.71  | 87.0209   |
| 4   | 2925.48  | 93.244    |
| 7   | 1509.03  | 89.4465   |
| 10  | 1168.65  | 95.5139   |
| 13  | 854.311  | 98.4714   |
| 16  | 418.477  | 97.9128   |

| No. | Position | Intensity |
|-----|----------|-----------|
| 2   | 3208     | 93.113    |
| 5   | 1696.77  | 89.827    |
| 8   | 1405.85  | 93.7974   |
| 11  | 1118.51  | 95.0188   |
| 14  | 712.589  | 98.9257   |

| No. | Position | Intensity |
|-----|----------|-----------|
| 3   | 3110.62  | 94.4106   |
| 6   | 1583.99  | 89.7968   |
| 9   | 1334.5   | 90.7615   |
| 12  | 1067.78  | 95.9433   |
| 15  | 595.896  | 98.7525   |

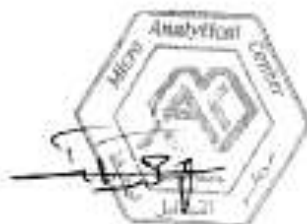

Compound 7c

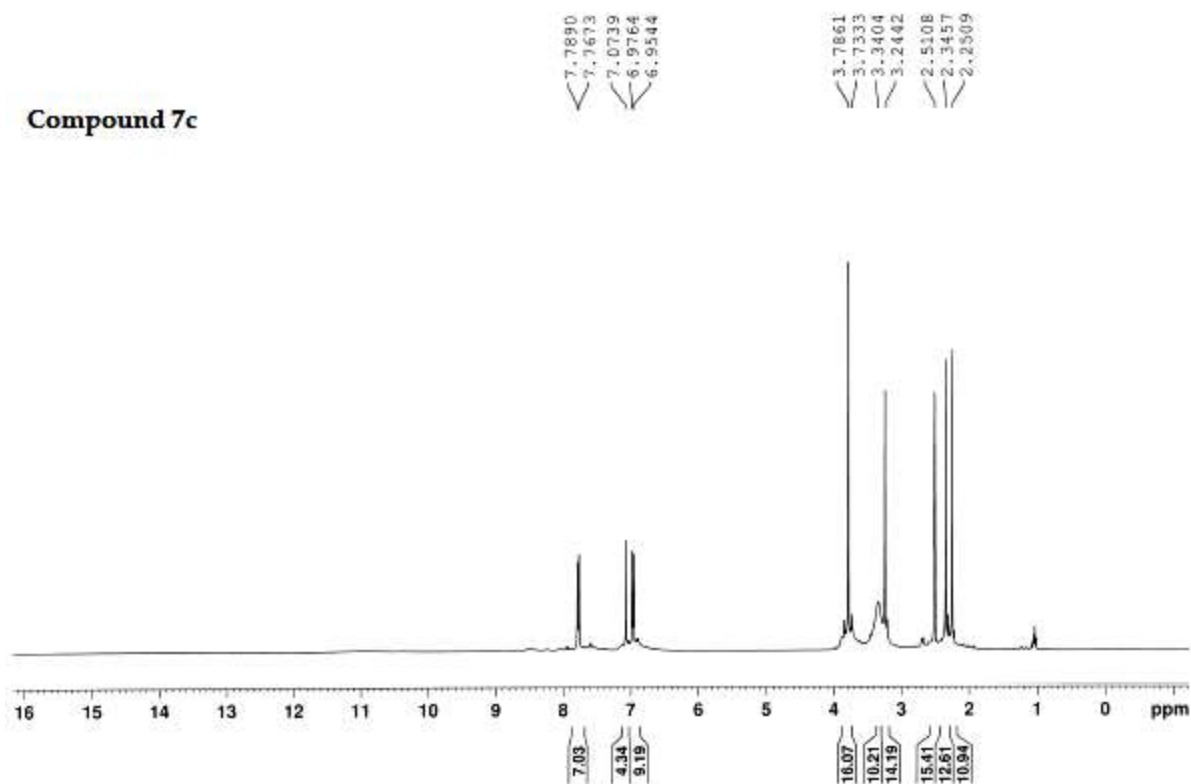

Compound 7c

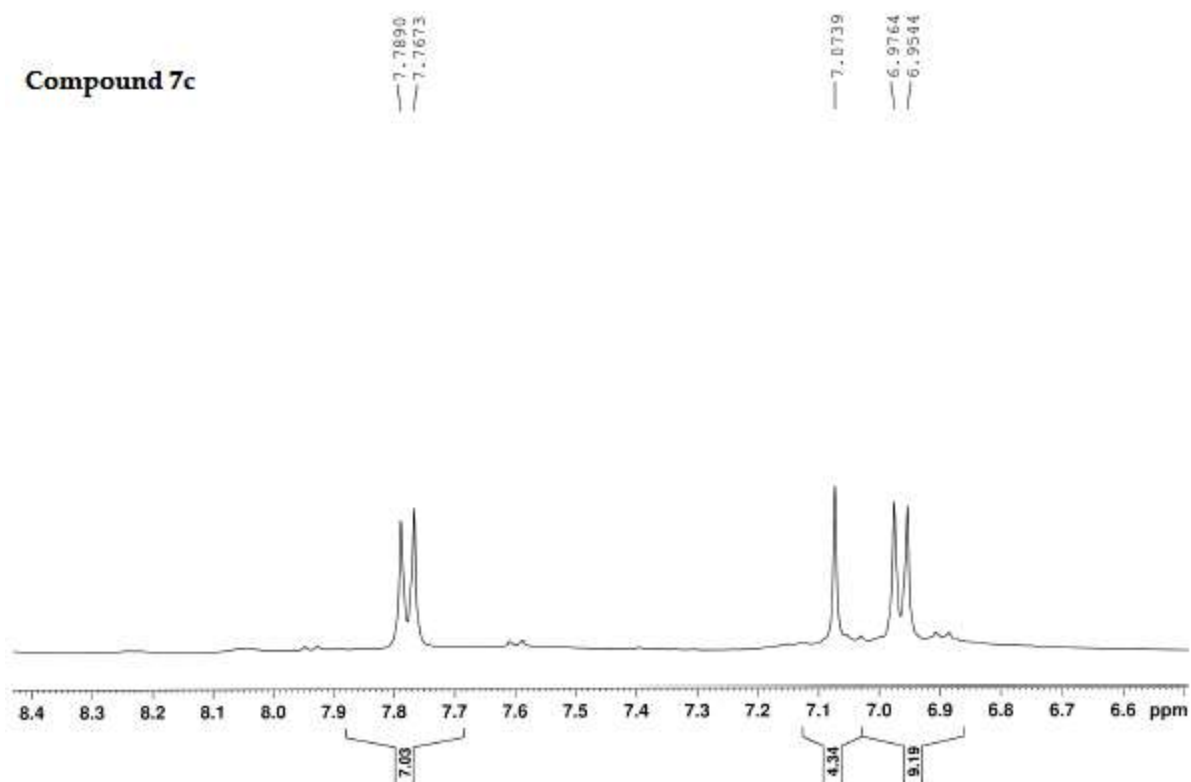

Compound 7e

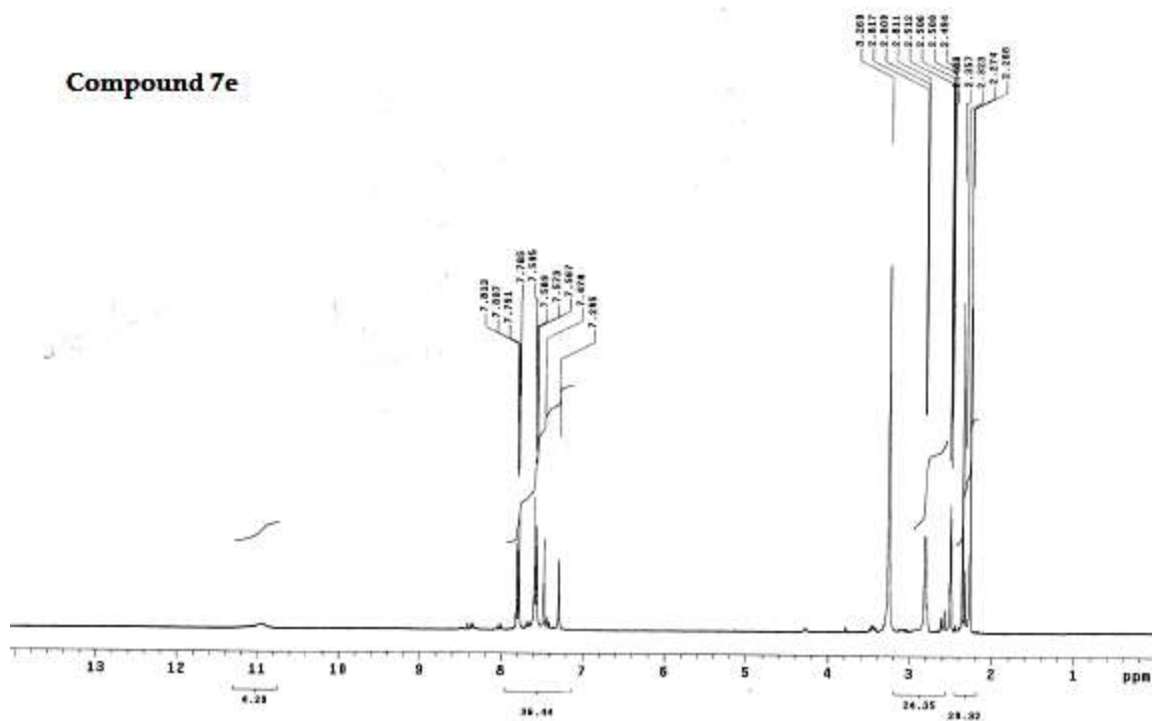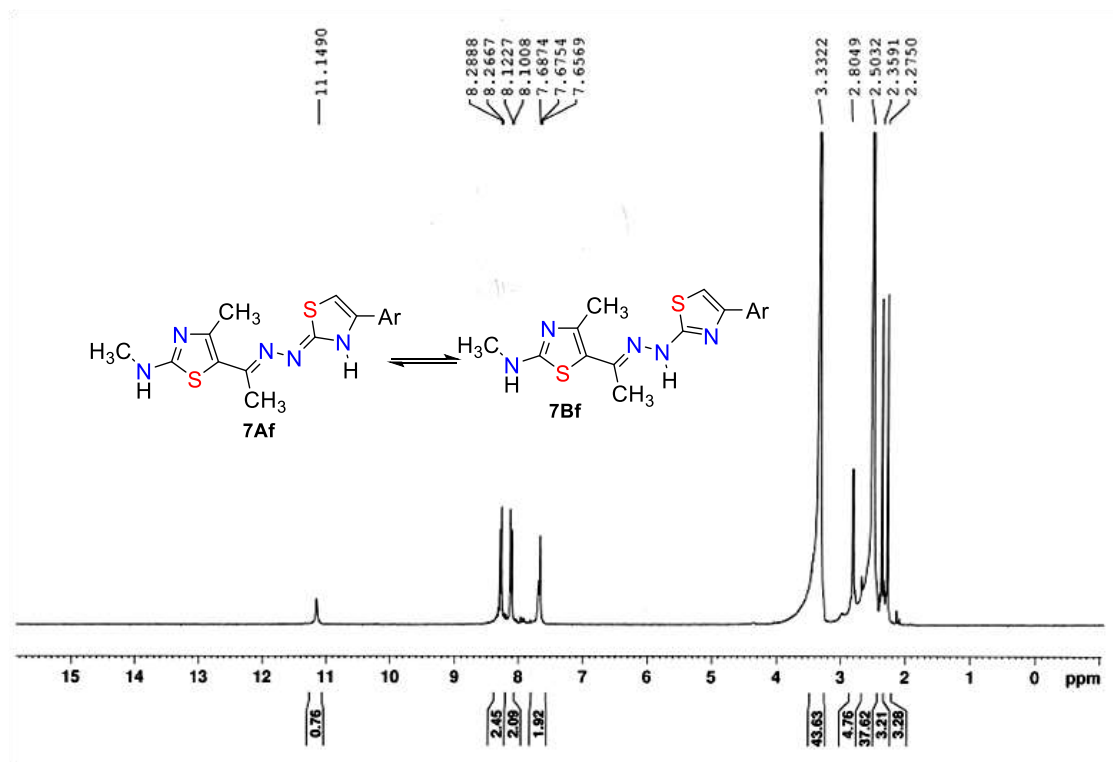

**Compound 7f**

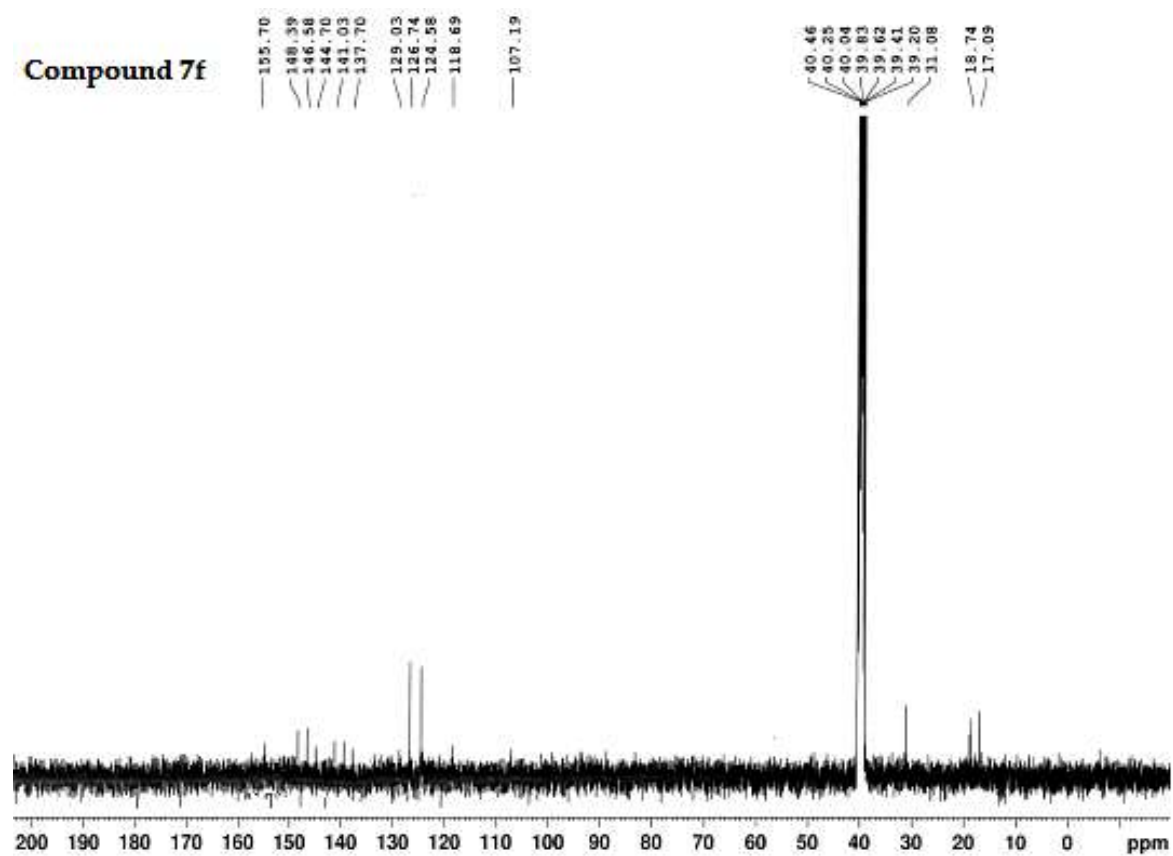



# Peak Find - Memory-72

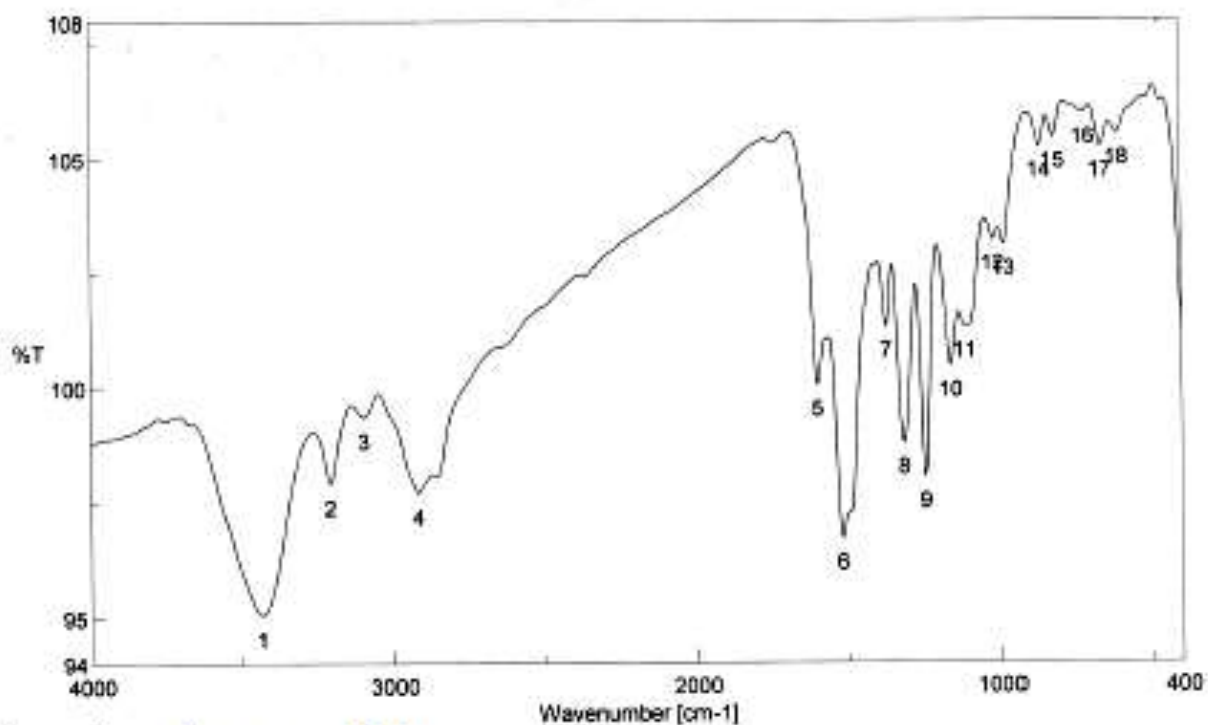

[Comments]  
 Sample name  
 Comment  
 User  
 Division  
 Company

## Compound 9a

6/2018  
 IR  
 IR  
 MAC

### [ Result of Peak Picking ]

| No. | Position | Intensity | No. | Position | Intensity | No. | Position | Intensity |
|-----|----------|-----------|-----|----------|-----------|-----|----------|-----------|
| 1   | 3436.53  | 95.0565   | 2   | 3209.93  | 97.9074   | 3   | 3098.08  | 99.351    |
| 4   | 2920.66  | 97.7048   | 5   | 1598.7   | 100.04    | 6   | 1518.67  | 96.7069   |
| 7   | 1372.1   | 101.311   | 8   | 1315.21  | 96.7738   | 9   | 1244.83  | 98.0352   |
| 10  | 1160.94  | 100.451   | 11  | 1112.73  | 101.309   | 12  | 1018.23  | 103.2     |
| 13  | 983.518  | 103.092   | 14  | 869.739  | 105.244   | 15  | 823.455  | 105.447   |
| 16  | 722.211  | 105.974   | 17  | 666.285  | 105.243   | 18  | 610.36   | 105.52    |

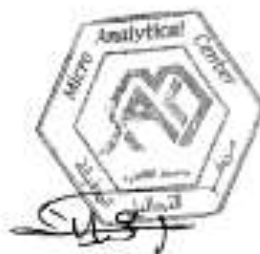

Compound 9a

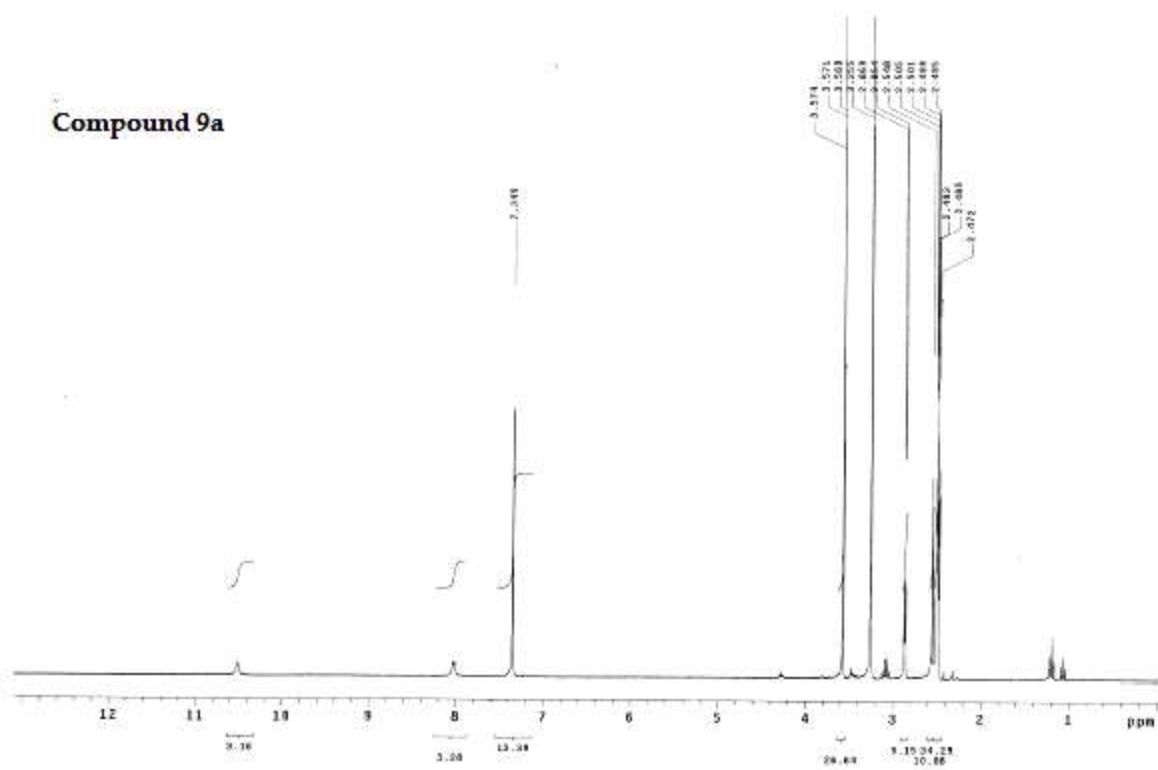

# Peak Find - Memory-6

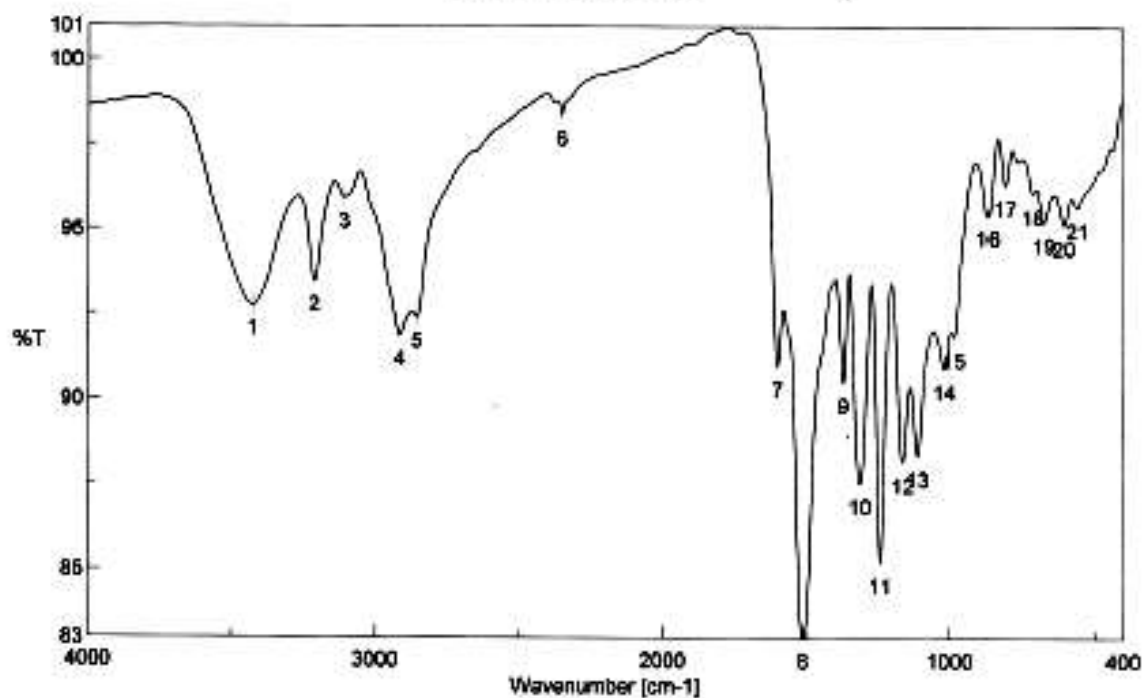

[Comments]

Sample name

**Compound 9b**

Comment

11/2018

User

IR

Division

IR

Company

MAC

[ Result of Peak Picking ]

| No. | Position | Intensity | No. | Position | Intensity | No. | Position | Intensity |
|-----|----------|-----------|-----|----------|-----------|-----|----------|-----------|
| 1   | 3426.89  | 82.7543   | 2   | 3210.9   | 93.4446   | 3   | 3106.8   | 95.9259   |
| 4   | 2916.81  | 91.8534   | 5   | 2857.02  | 92.3829   | 6   | 2348.87  | 98.375    |
| 7   | 1600.63  | 90.8643   | 8   | 1511.92  | 83.0263   | 9   | 1372.1   | 90.4938   |
| 10  | 1315.21  | 87.5435   | 11  | 1243.86  | 85.2285   | 12  | 1164.79  | 88.1617   |
| 13  | 1113.89  | 88.3474   | 14  | 1019.19  | 90.9008   | 15  | 985.447  | 91.8334   |
| 16  | 969.739  | 95.4384   | 17  | 814.777  | 96.3259   | 18  | 716.425  | 96.067    |
| 19  | 677.858  | 95.2327   | 20  | 608.431  | 95.1486   | 21  | 561.184  | 95.8803   |

Compound 9b

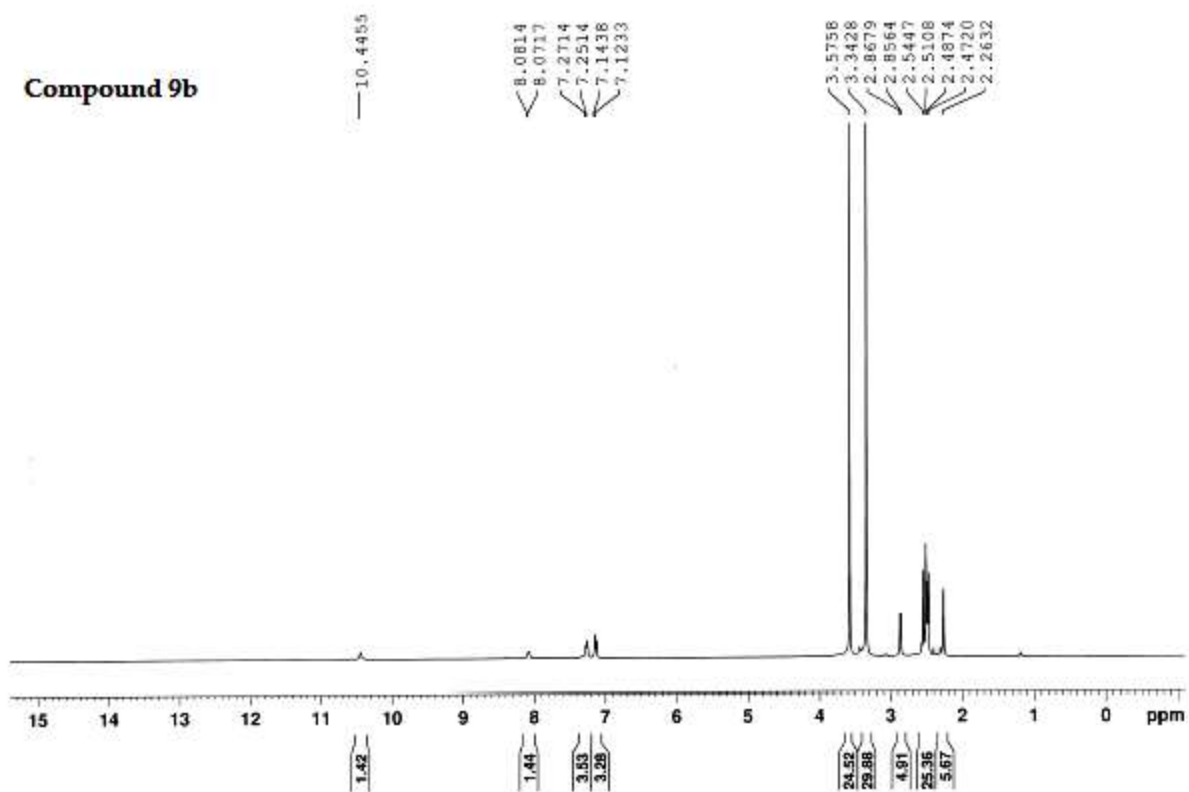



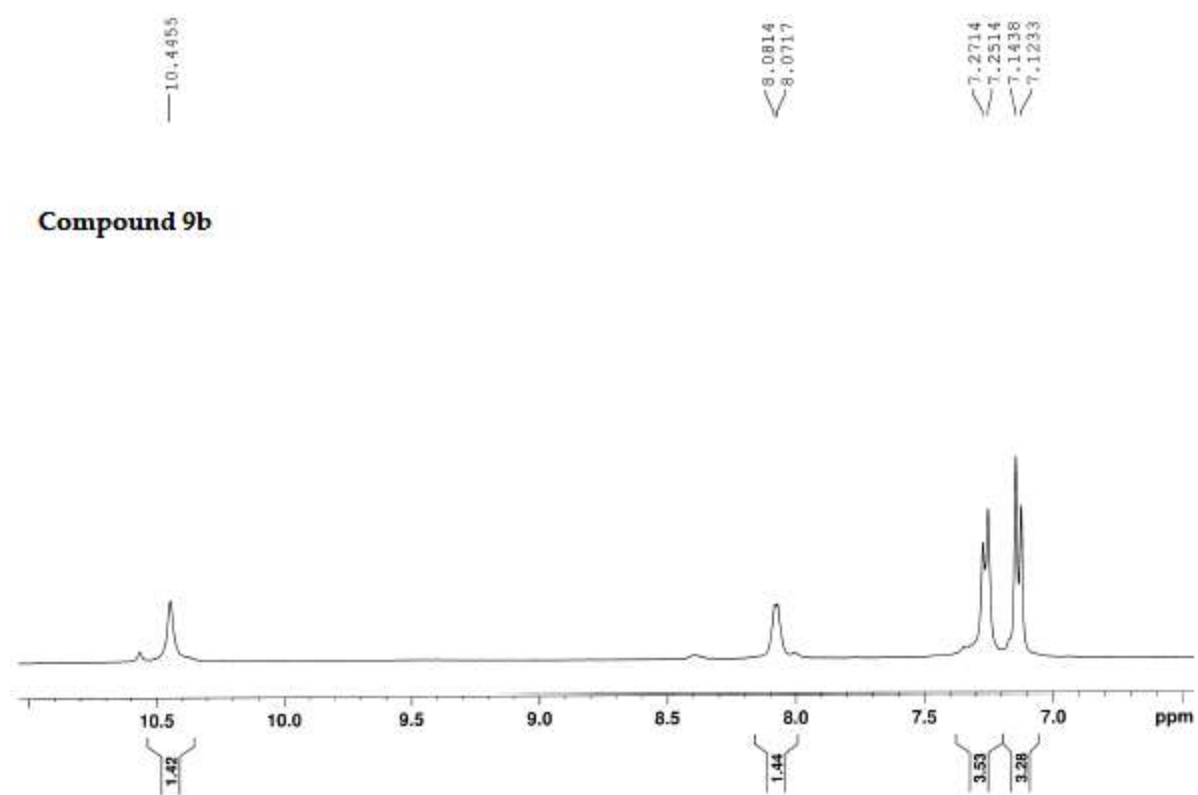

# Peak Find - Memory-47

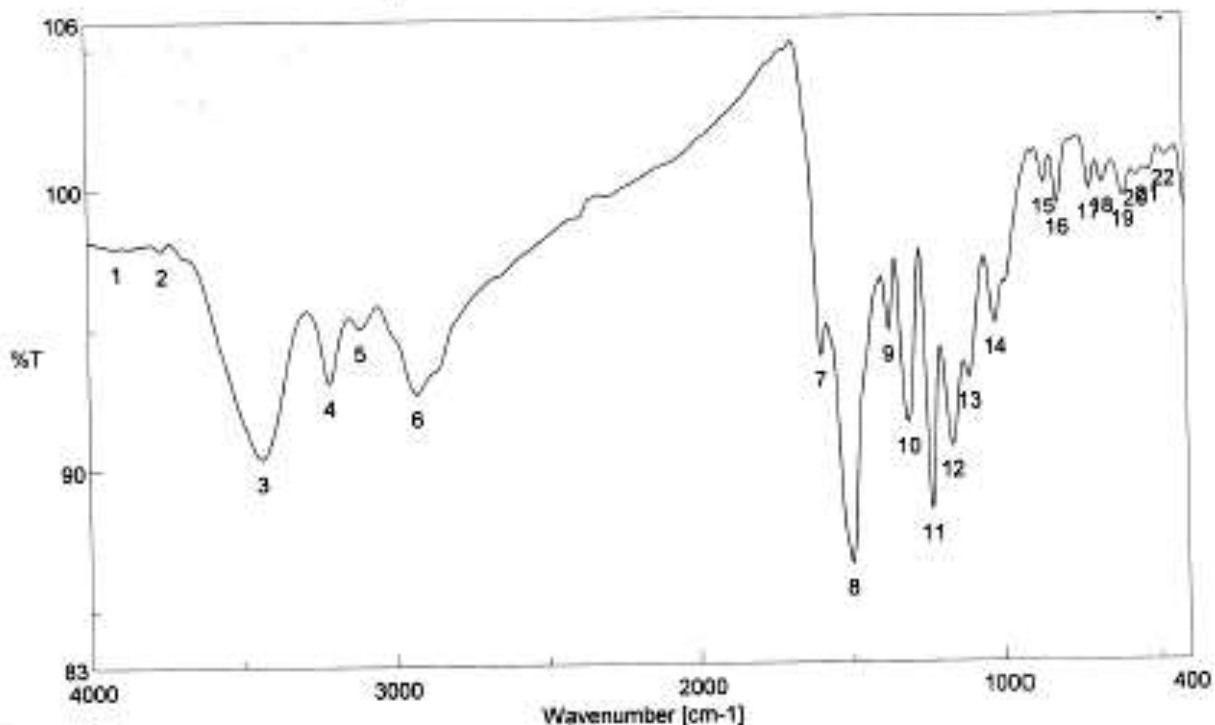

[Comments]  
Sample name  
Comment  
User  
Division  
Company

## Compound 9c

6/2018  
IR  
IR  
MAC

### [ Result of Peak Picking ]

| No. | Position | Intensity | No. | Position | Intensity | No. | Position | Intensity |
|-----|----------|-----------|-----|----------|-----------|-----|----------|-----------|
| 1   | 3905.15  | 97.8017   | 2   | 3752.8   | 97.8199   | 3   | 3430.74  | 90.3983   |
| 4   | 3210.9   | 93.0697   | 5   | 3107.72  | 95.0024   | 6   | 2923.56  | 92.6618   |
| 7   | 1595.81  | 93.9024   | 8   | 1500.35  | 86.5089   | 9   | 1372.1   | 94.7812   |
| 10  | 1313.29  | 91.5088   | 11  | 1236.15  | 88.4153   | 12  | 1167.69  | 90.6702   |
| 13  | 1109.83  | 93.0927   | 14  | 1023.05  | 95.001    | 15  | 864.917  | 99.9623   |
| 16  | 820.563  | 99.2196   | 17  | 715.461  | 99.7485   | 18  | 673.035  | 99.9498   |
| 19  | 603.61   | 99.4827   | 20  | 558.291  | 100.206   | 21  | 517.793  | 100.348   |
| 22  | 464.761  | 100.924   |     |          |           |     |          |           |

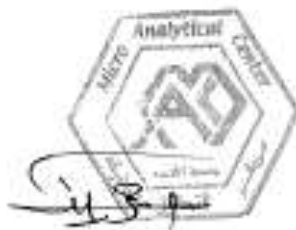

Compound 9d

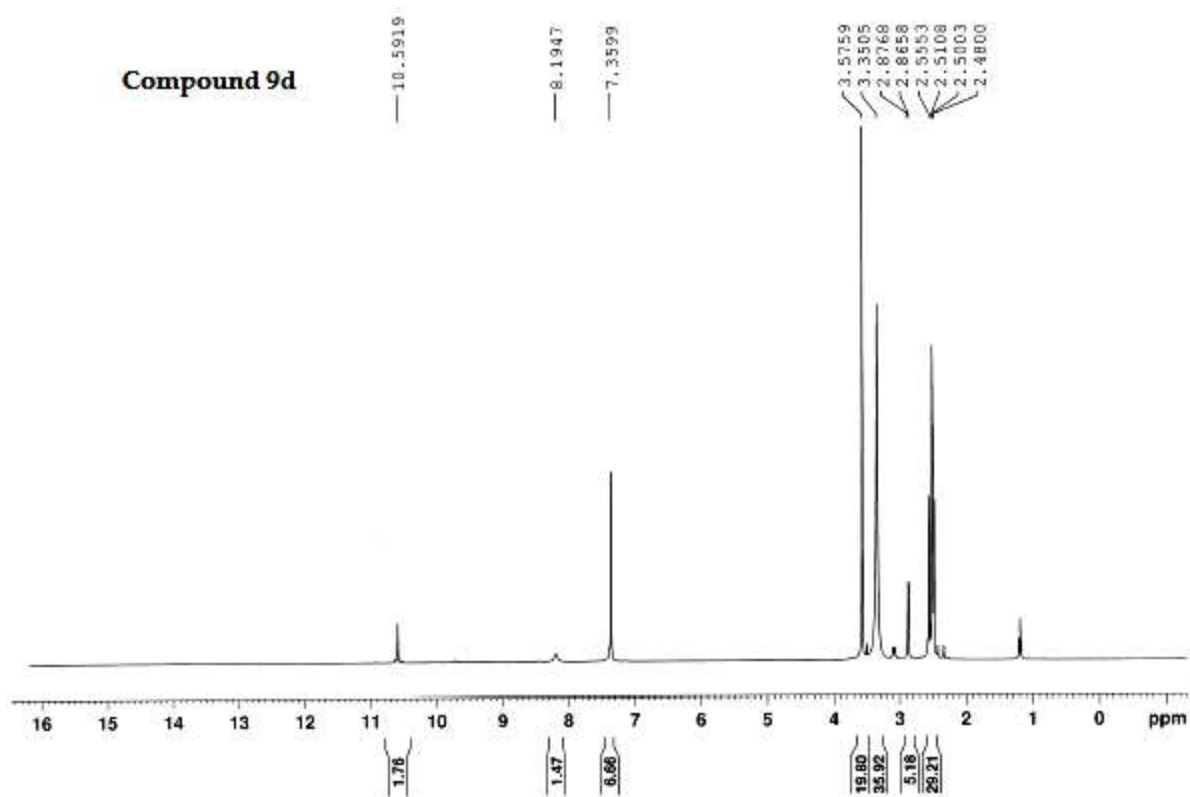

# Peak Find - Memory-10

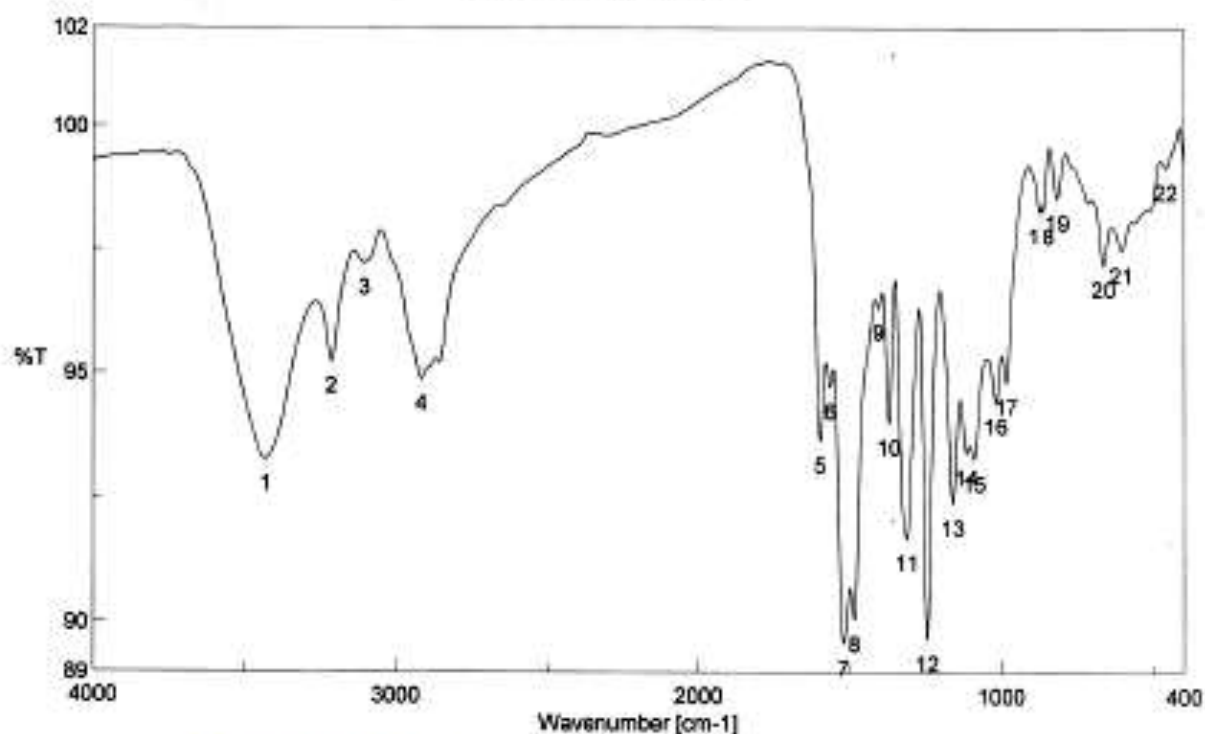

[Comments]

Sample name

Comment

User

Division

Company

**Compound 9d**

11/2018

IR

IR

MAC

[ Result of Peak Picking ]

| No. | Position | Intensity | No. | Position | Intensity | No. | Position | Intensity |
|-----|----------|-----------|-----|----------|-----------|-----|----------|-----------|
| 1   | 3427.85  | 93.2727   | 2   | 3210.9   | 95.2372   | 3   | 3103.87  | 97.2411   |
| 4   | 2915.84  | 94.887    | 5   | 1598.7   | 93.6494   | 6   | 1564.95  | 94.731    |
| 7   | 1521.56  | 89.5833   | 8   | 1486.85  | 90.0618   | 9   | 1405.85  | 96.3344   |
| 10  | 1372.1   | 94.0145   | 11  | 1313.29  | 91.6946   | 12  | 1245.79  | 89.8898   |
| 13  | 1180.94  | 92.3946   | 14  | 1115.62  | 93.4127   | 15  | 1090.55  | 93.2873   |
| 16  | 1018.23  | 94.4377   | 17  | 984.482  | 94.8284   | 18  | 889.739  | 98.2874   |
| 19  | 821.527  | 98.5535   | 20  | 867.25   | 97.213    | 21  | 808.431  | 97.4862   |
| 22  | 458.939  | 99.1887   |     |          |           |     |          |           |

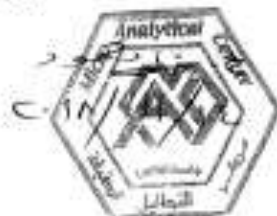



# Peak Find - Memory-57

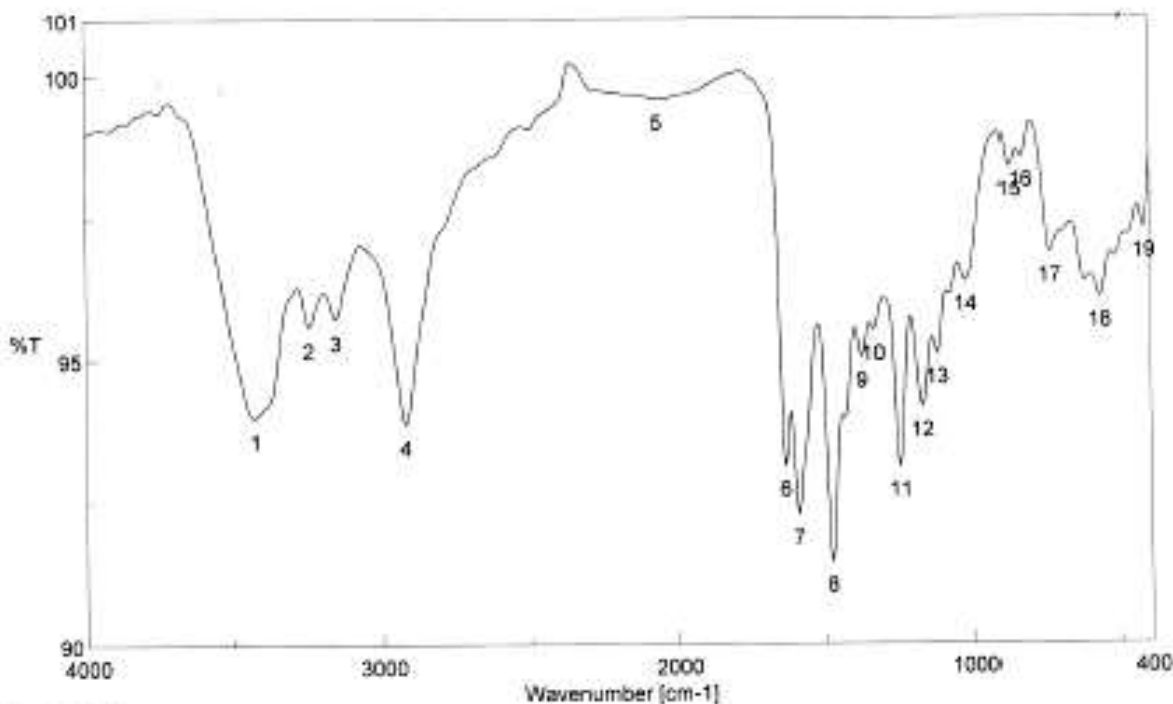

[Comments]  
Sample name  
Comment  
User  
Division  
Company

## Compound 9e

6/2018  
IR  
IR  
MAC

### [ Result of Peak Picking ]

| No. | Position | Intensity | No. | Position | Intensity | No. | Position | Intensity |
|-----|----------|-----------|-----|----------|-----------|-----|----------|-----------|
| 1   | 3425.92  | 93.9871   | 2   | 3244.65  | 95.5777   | 3   | 3155.94  | 95.709    |
| 4   | 2920.65  | 93.8701   | 5   | 2081.53  | 99.5736   | 6   | 1636.3   | 93.1242   |
| 7   | 1592.91  | 92.2744   | 8   | 1480.1   | 91.4512   | 9   | 1375.96  | 95.0254   |
| 10  | 1336.43  | 95.4947   | 11  | 1248.68  | 93.1117   | 12  | 1171.54  | 94.1572   |
| 13  | 1120.44  | 95.0879   | 14  | 1022.09  | 96.356    | 15  | 877.452  | 98.3678   |
| 16  | 837.919  | 98.5354   | 17  | 741.496  | 98.8545   | 18  | 572.755  | 96.0636   |
| 19  | 421.37   | 97.2842   |     |          |           |     |          |           |

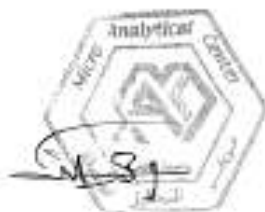

Compound 9f

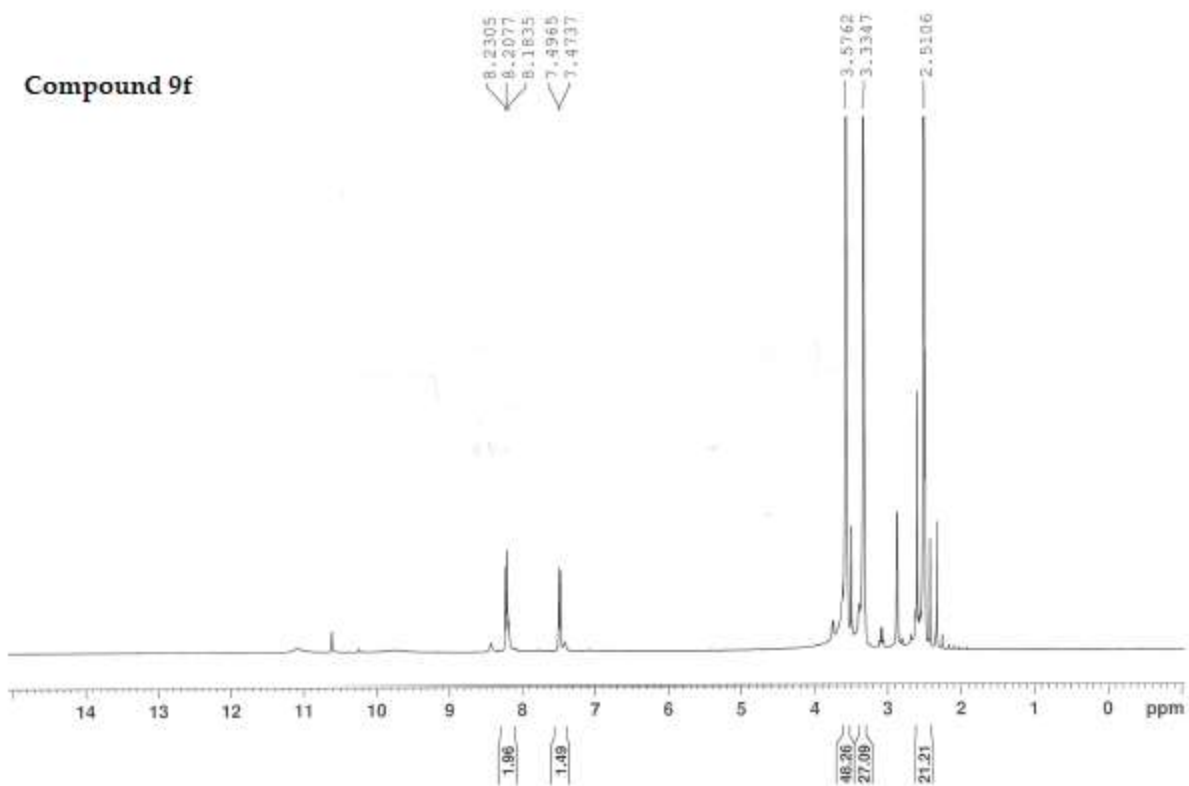

# Peak Find - Memory-81

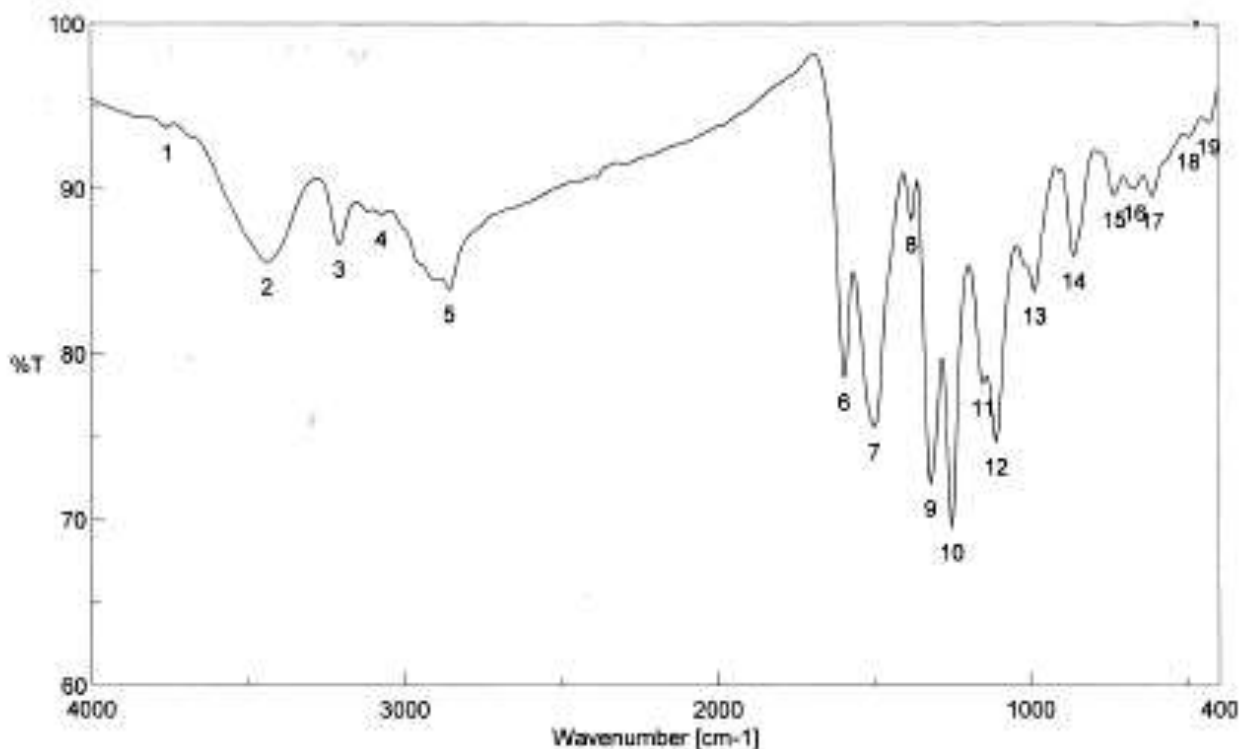

[Comments]  
Sample name  
Comment  
User  
Division  
Company

## Compound 9f

6/2018  
IR  
IR  
MAC

### [ Result of Peak Picking ]

| No. | Position | Intensity | No. | Position | Intensity | No. | Position | Intensity |
|-----|----------|-----------|-----|----------|-----------|-----|----------|-----------|
| 1   | 3753.76  | 93.6764   | 2   | 3432.67  | 85.5676   | 3   | 3204.15  | 86.5943   |
| 4   | 3070.12  | 88.4359   | 5   | 2853.17  | 83.8747   | 6   | 1593.88  | 78.5774   |
| 7   | 1497.45  | 75.5644   | 8   | 1375.96  | 88.1027   | 9   | 1319.07  | 72.1368   |
| 10  | 1251.58  | 69.4994   | 11  | 1150.33  | 78.2055   | 12  | 1107.9   | 74.645    |
| 13  | 982.554  | 83.7813   | 14  | 862.989  | 85.89     | 15  | 733.782  | 89.6946   |
| 16  | 668.214  | 89.986    | 17  | 612.288  | 89.5281   | 18  | 494.652  | 93.1383   |
| 19  | 429.084  | 94.0449   |     |          |           |     |          |           |

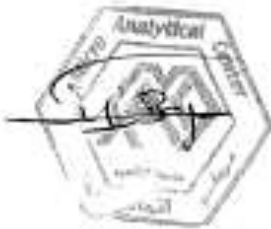

# Compound 3

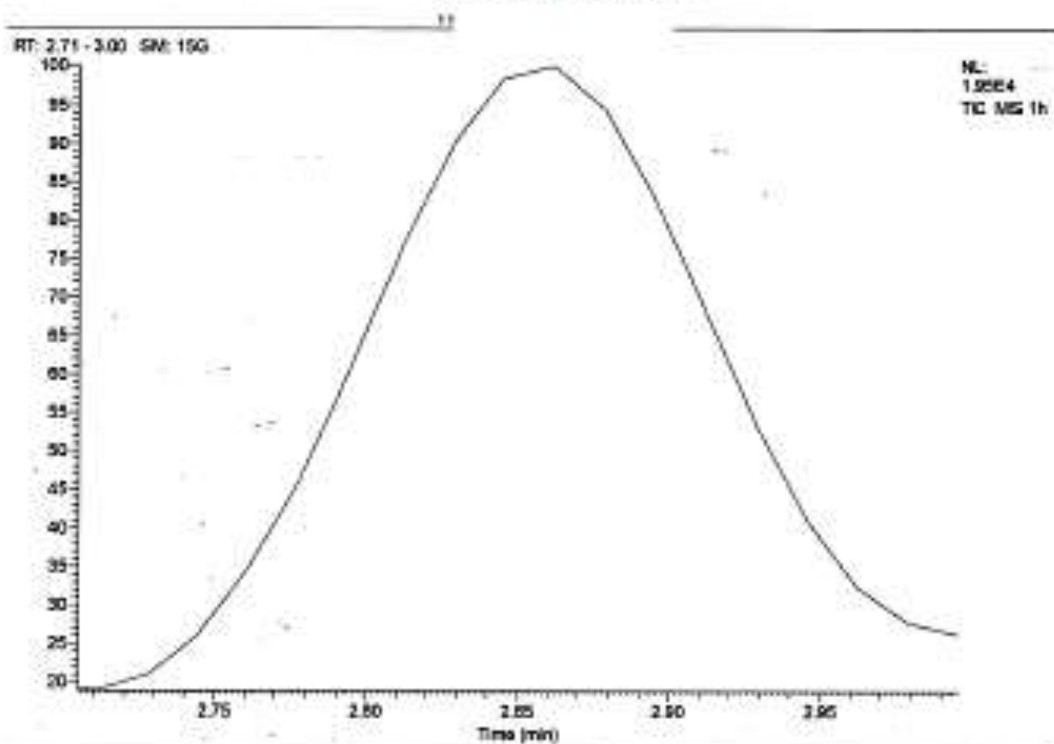

164201 RT: 3.38 AU: 1 NL: 3.27E2  
T: (DQ) + c EI Full ms (40.00-1000.00)

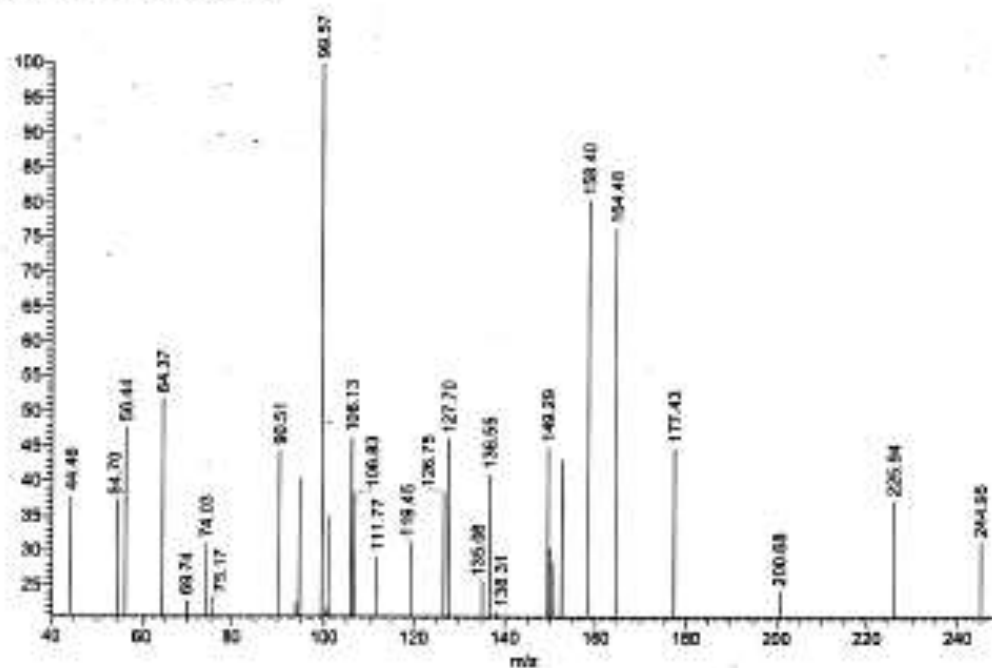



# Compound 5

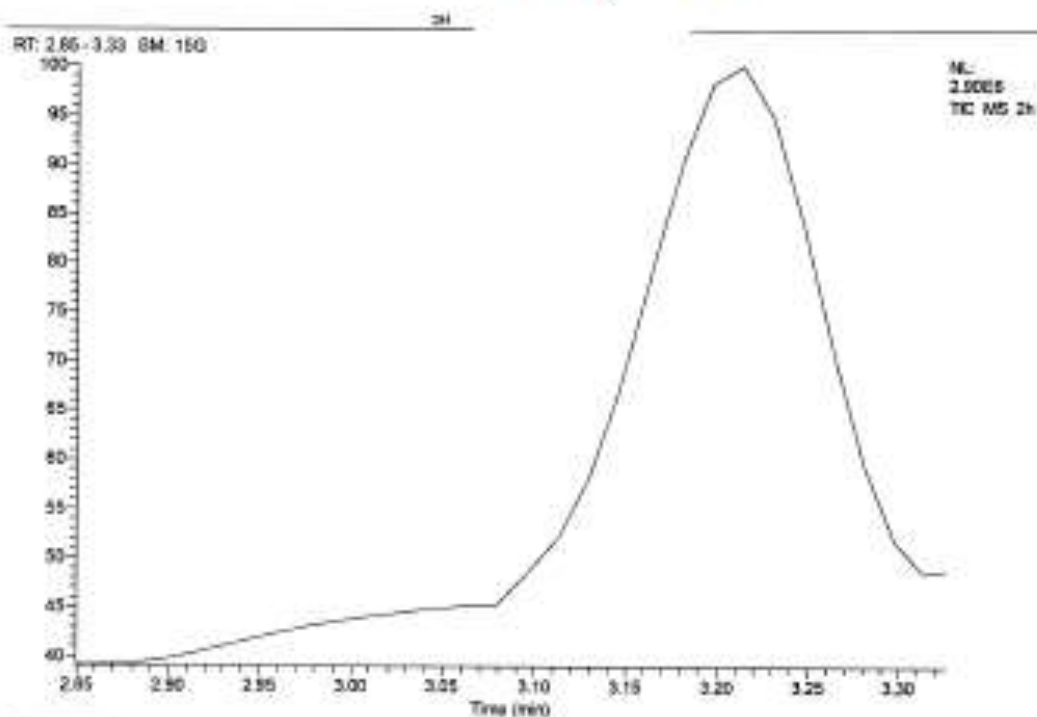

2h MS RT: 1.36 AV: 1 SB: 10 1.31-1.41 1.42-1.46 ML: 1.07E3  
T: (0.0) + c (0.0) Full ms (40.00-1000.00)

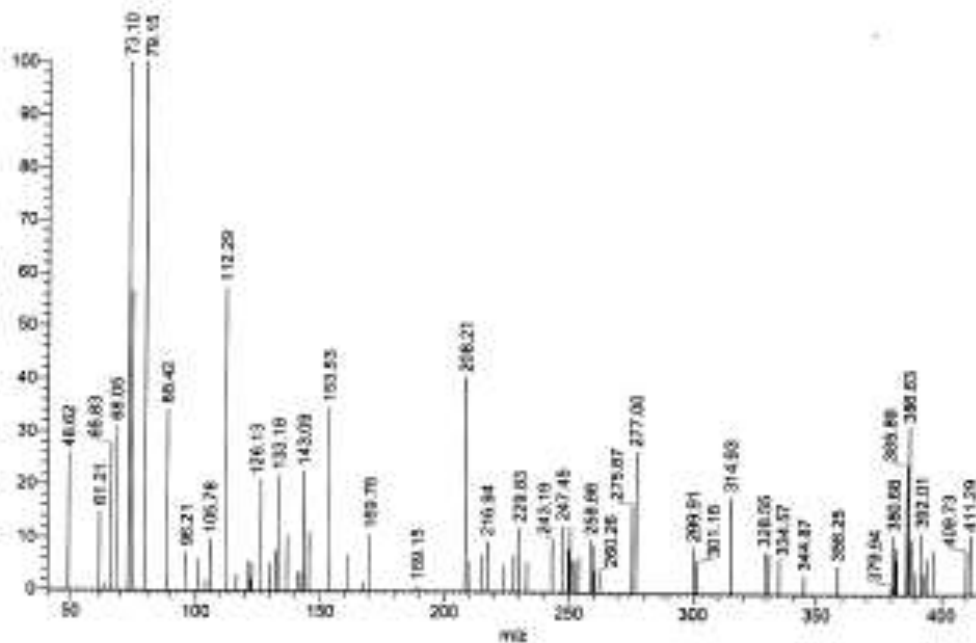

# Compound 7a

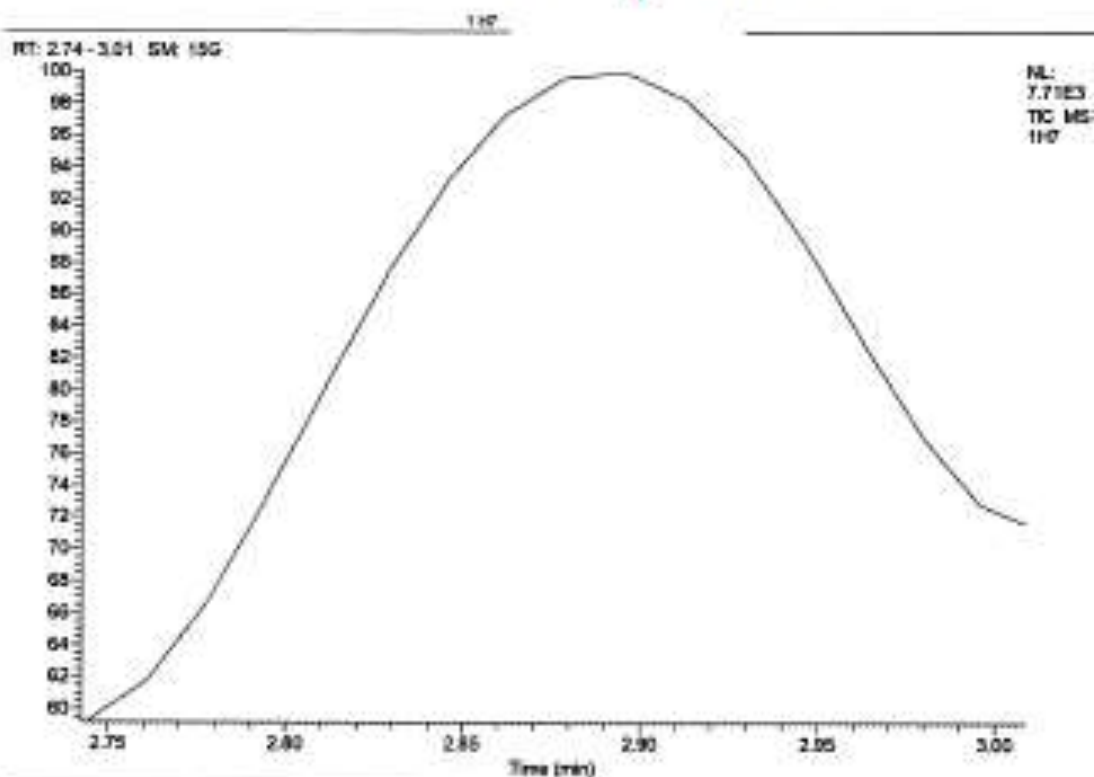

110° #190-192 RT: 3.20-3.23 AV: 3 SB: 9 2.51-2.63 2.48 NL: 1.71E3  
T: (0.0) +e El Fullres [40.00-1000.00]

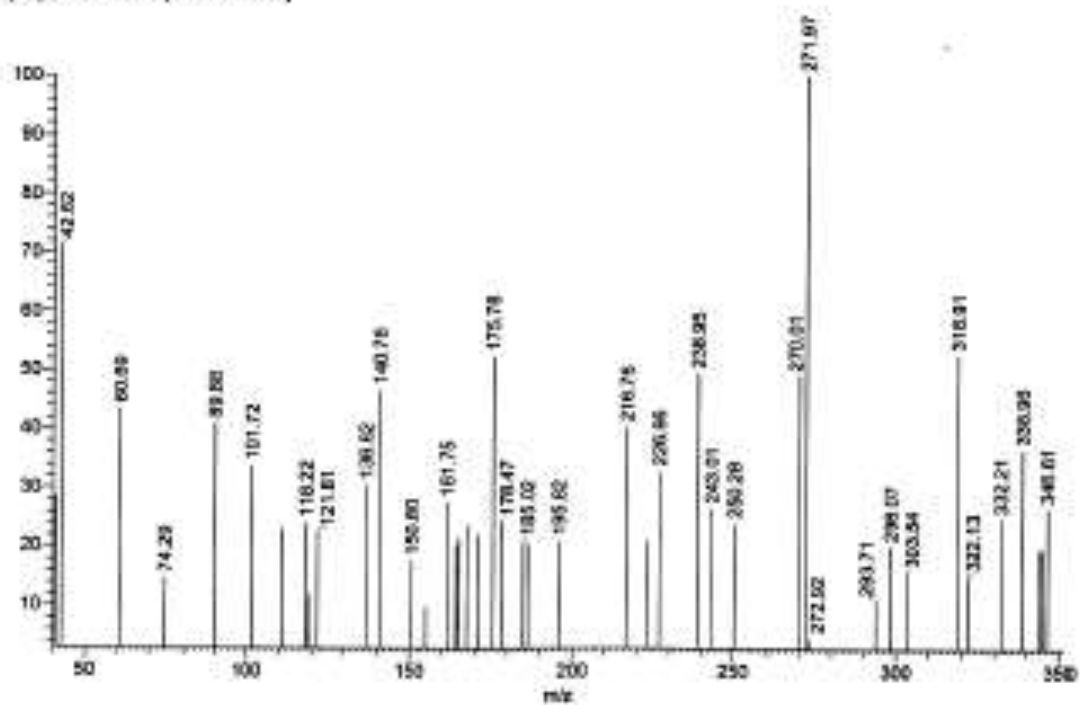

# Compound 7b

RT: 3.26 - 3.88 SM: 150

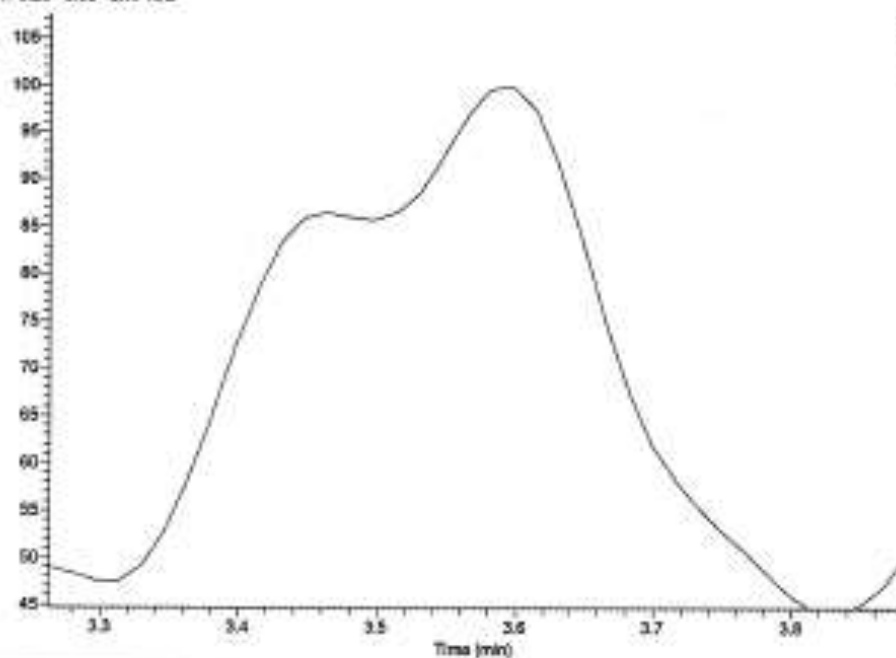

NL:  
2.55E4  
TIC MS  
TIC

196 #289 RT: 4.75 AV: 1 NL: 3.12E2  
T: (0.0) + c B1 Full ms (40.00-1000.00)

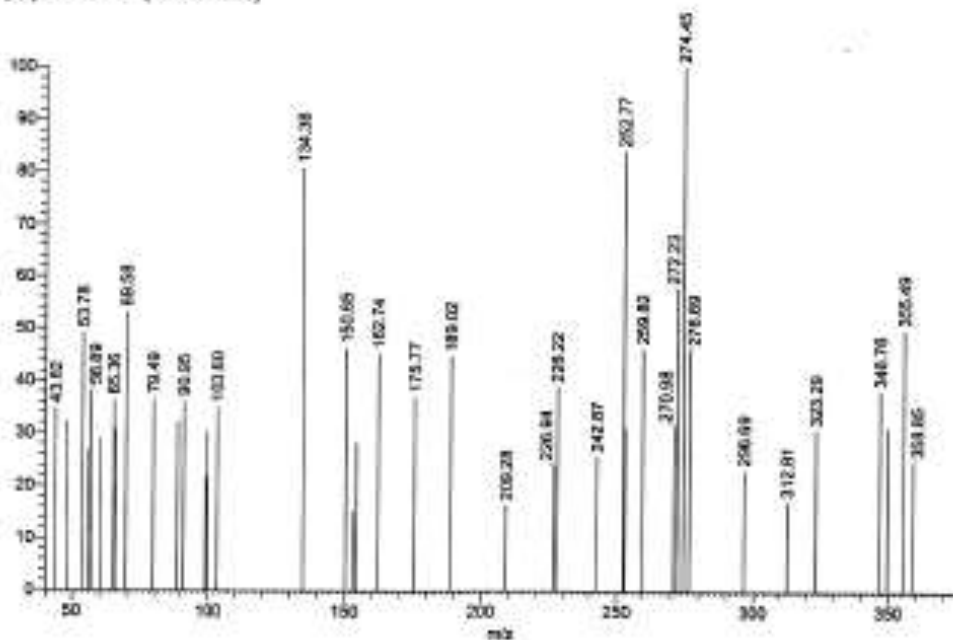

# Compound 7d

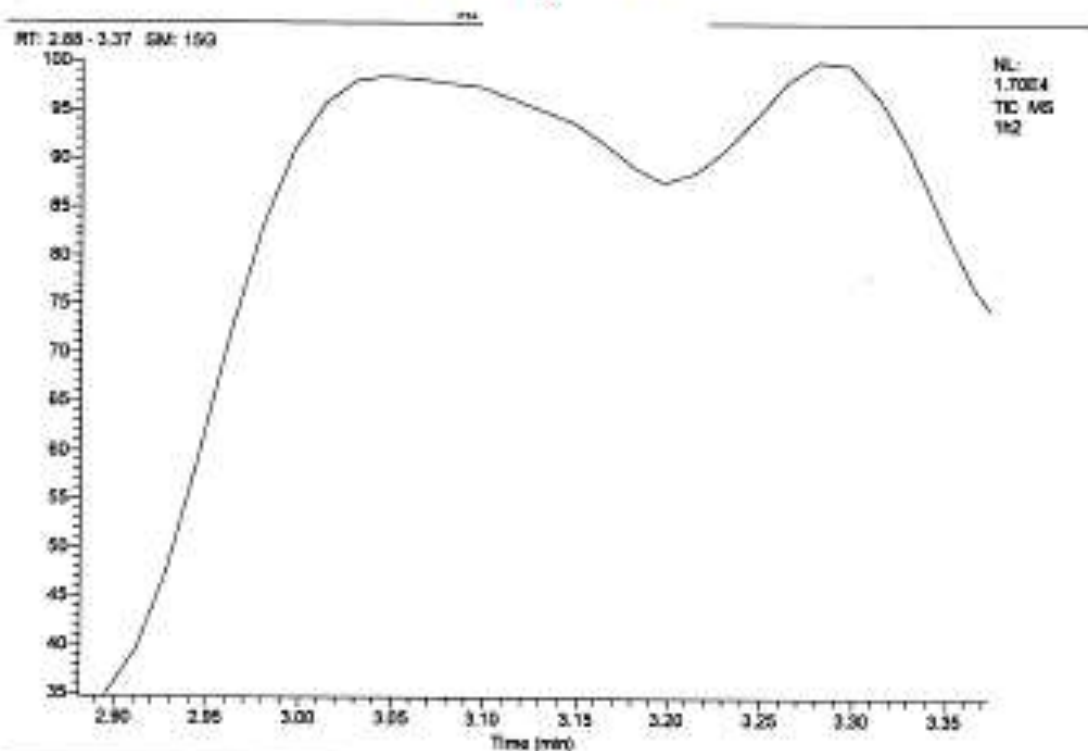

1H2 #151 RT: 2.54 AU: 1 NL: 0.67E2  
T: (0.0) + c.E) Full ms (40.00-1000.00)

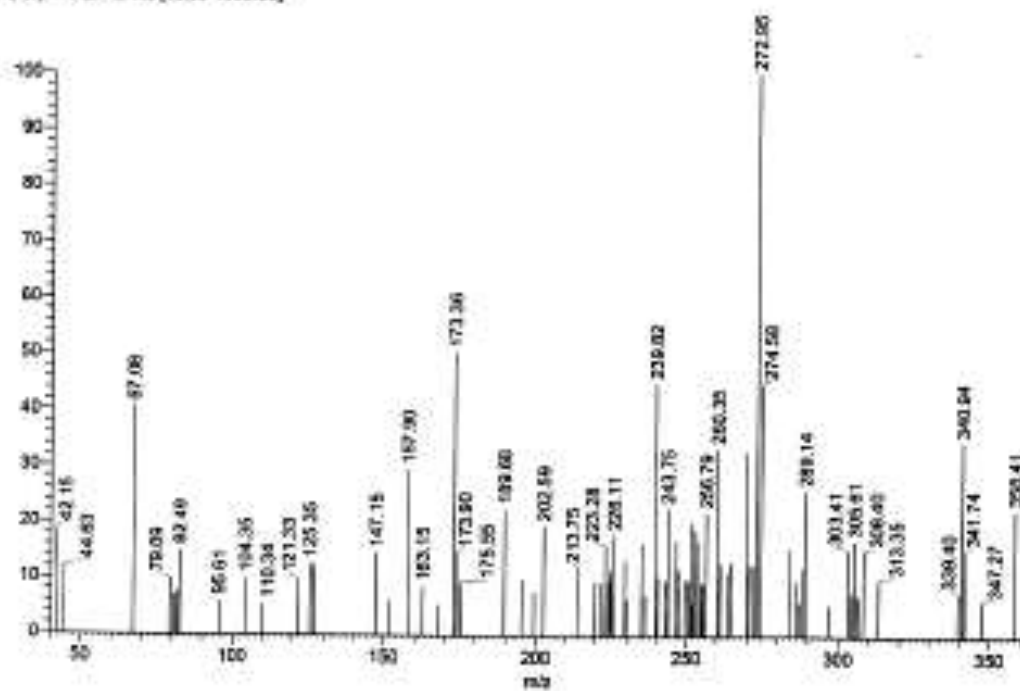

# Compound 7f

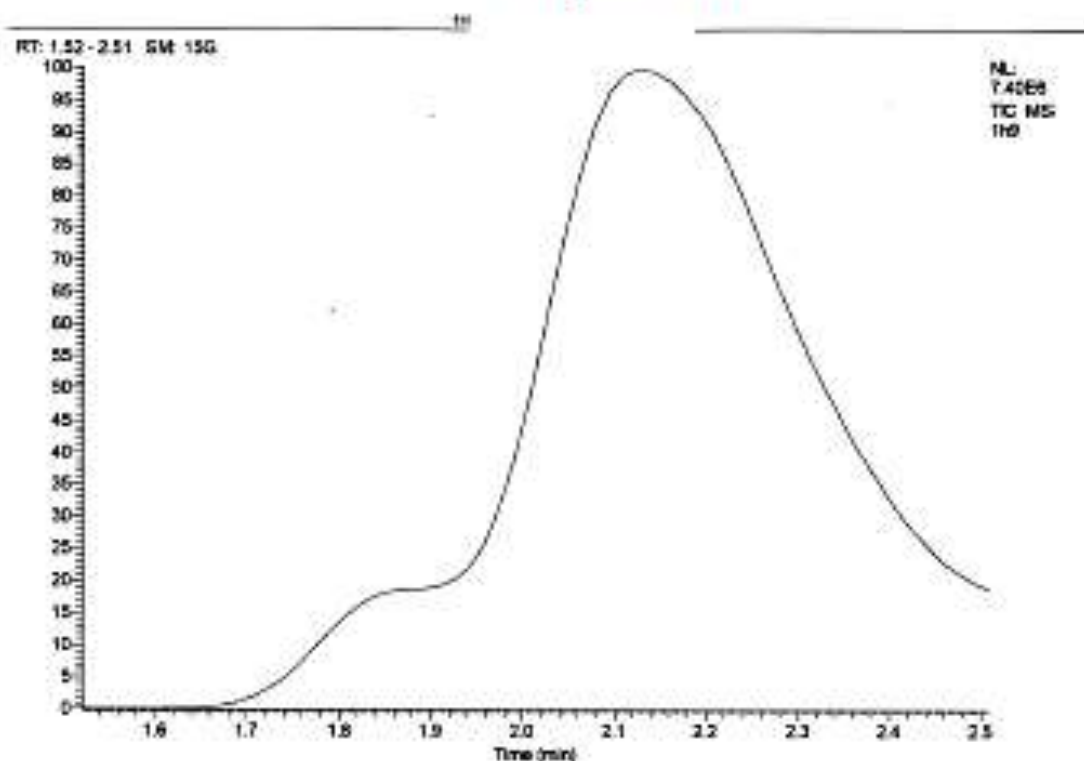

1H9 A231 RT: 3.88 AV: 1 NL: 7.0202  
T: [0.0] + c EI Full ms (40 00-1000.00)

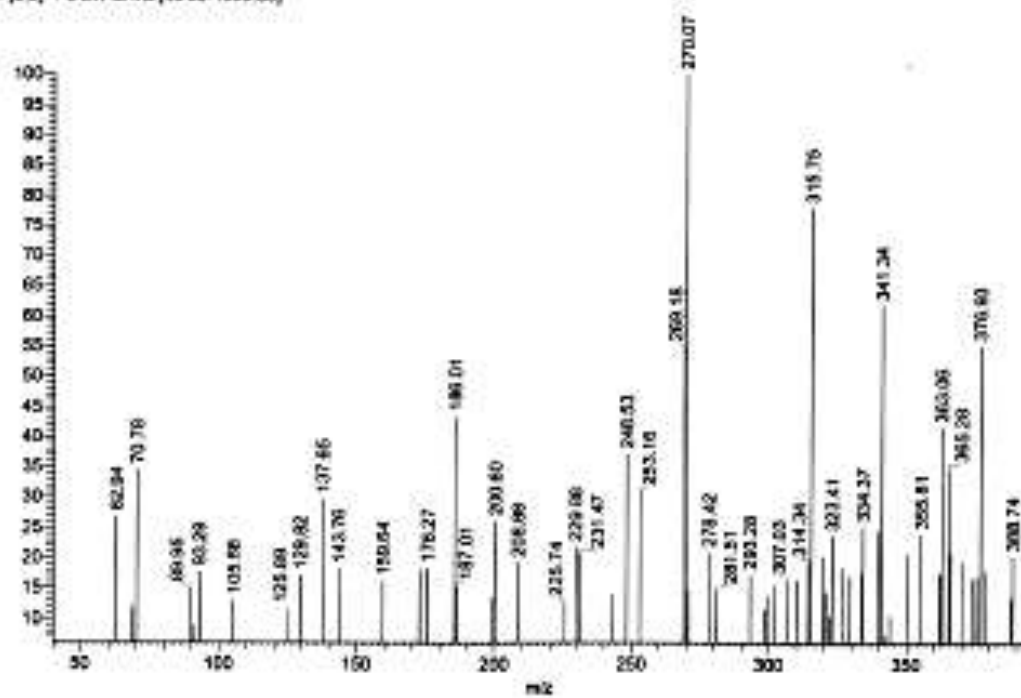

# Compound 9b

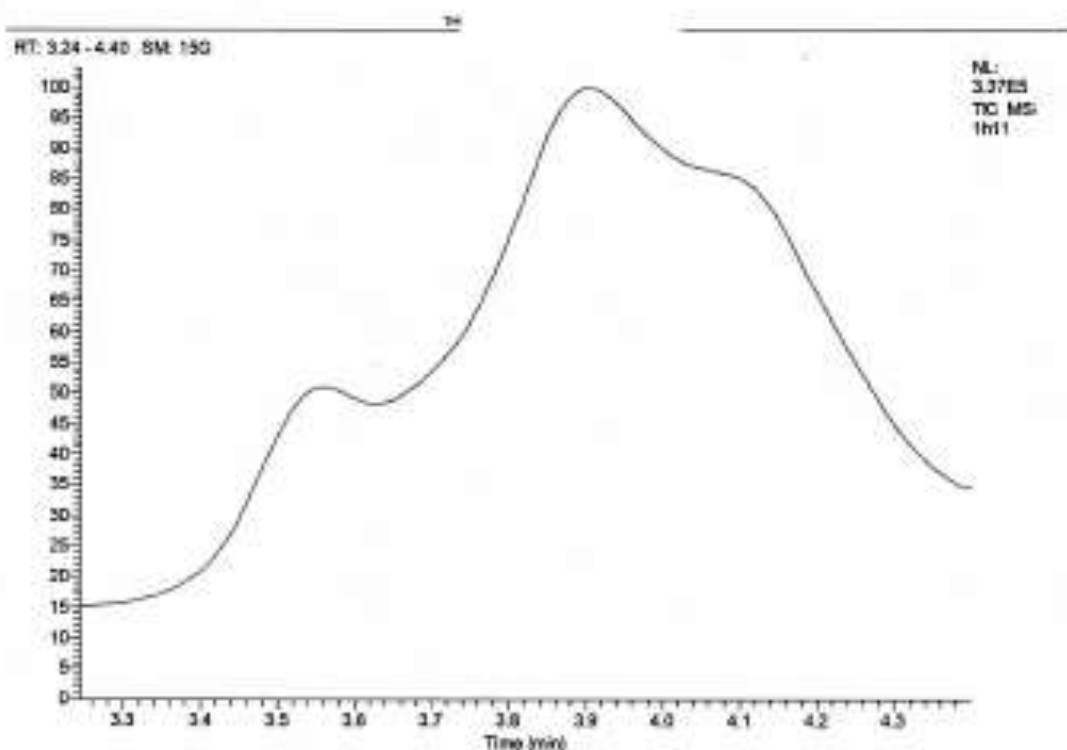

1h11 #150 RT: 3.25 AV: 1 NL: 1.42E3  
T: (3.0) + 5 E1 Full ms (40.00-1000.00)

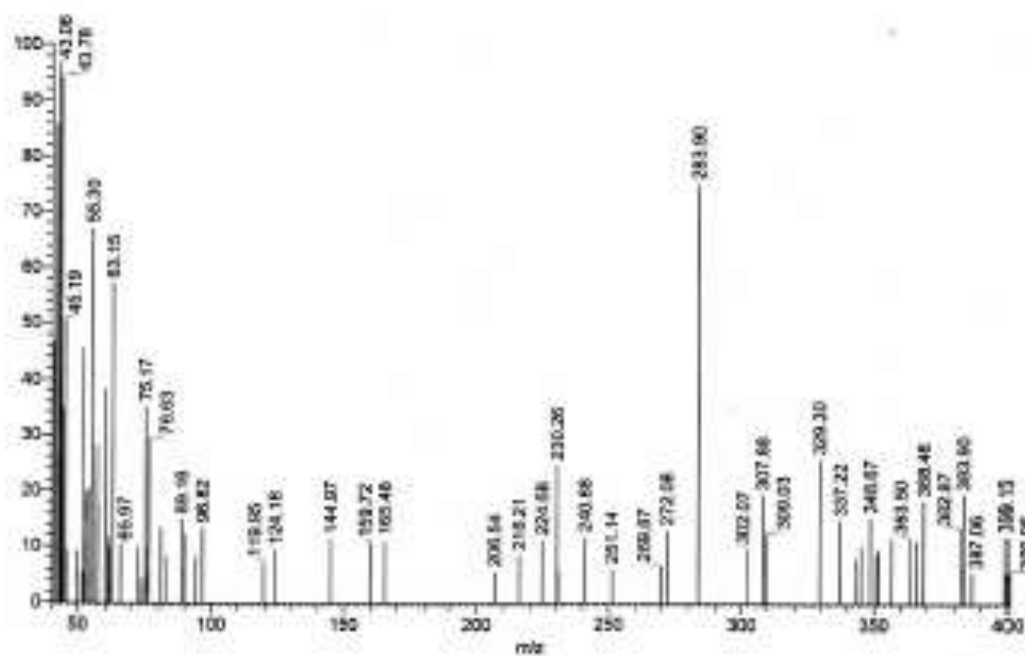



# compound 9d

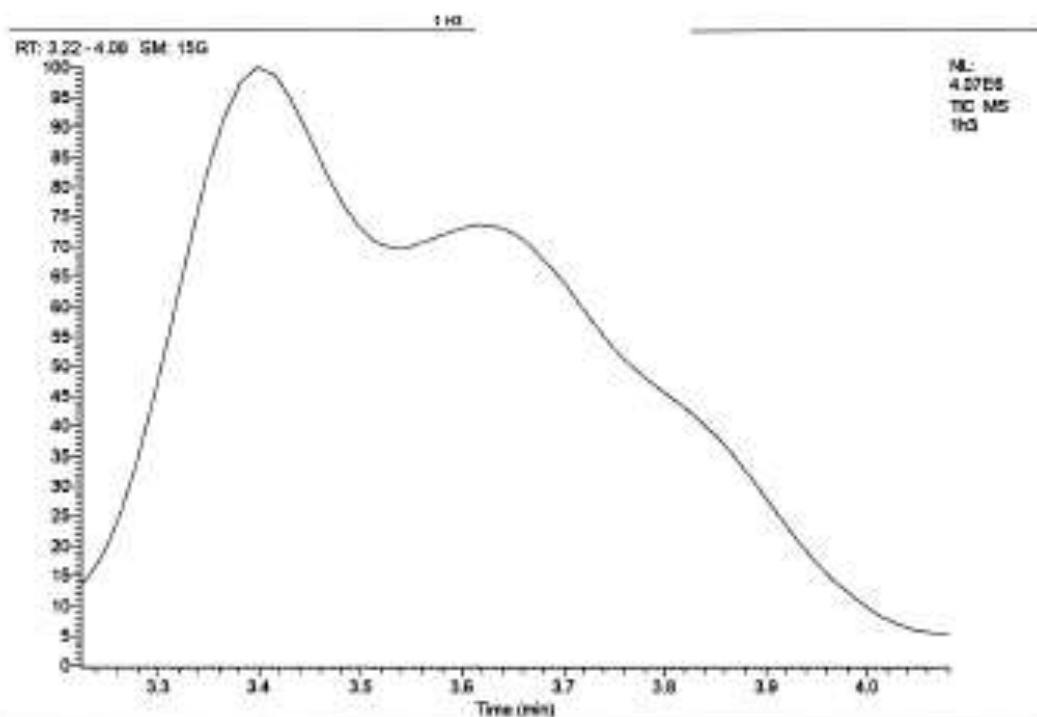

1h3 #262 RT: 4.40 AV: 1 NL: 6.37E2  
T: [0.0] + e ElFulm [40.00-1000.00]

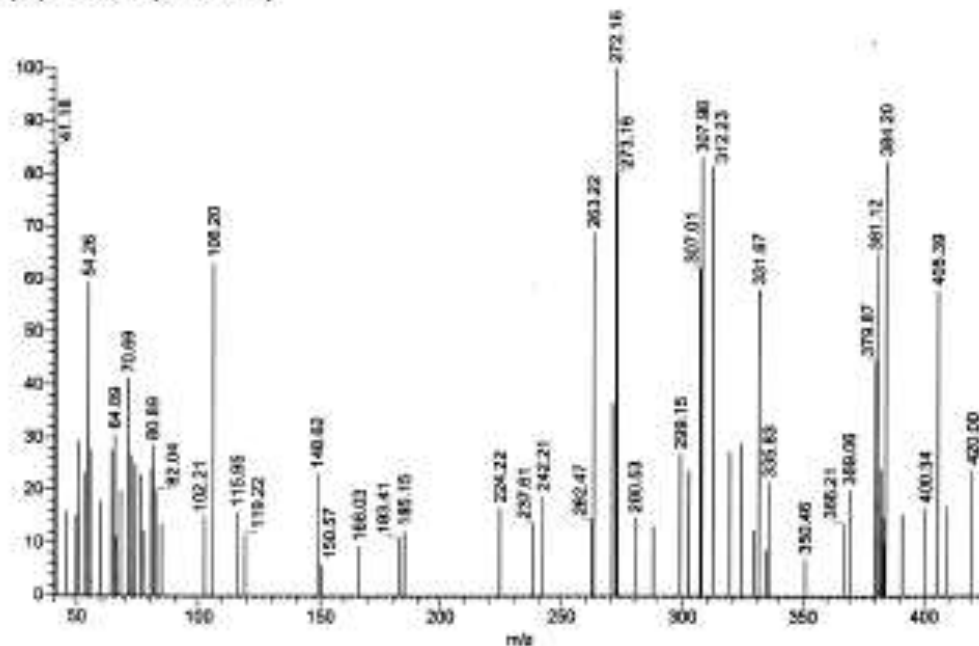

# Compound 9e

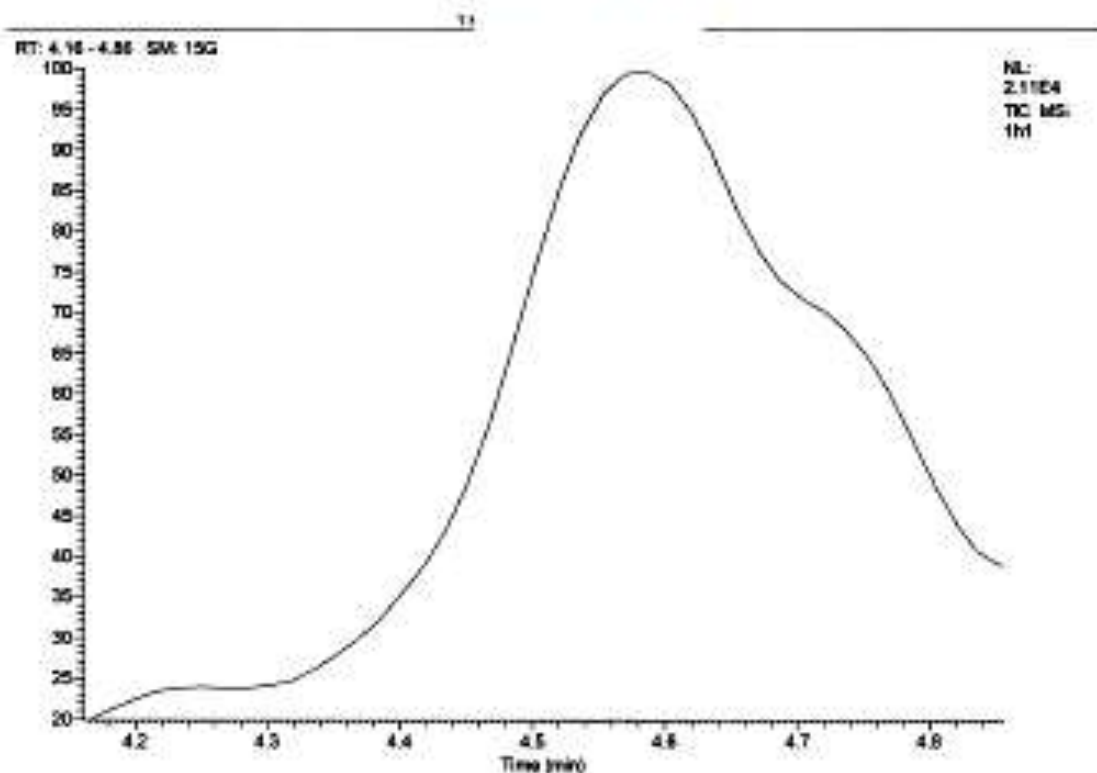

1h1#173 RT: 2.91 AV: 1 NL: 3.53E2  
T: (0.0) + c (1) Full ms (40.00-1000.00)

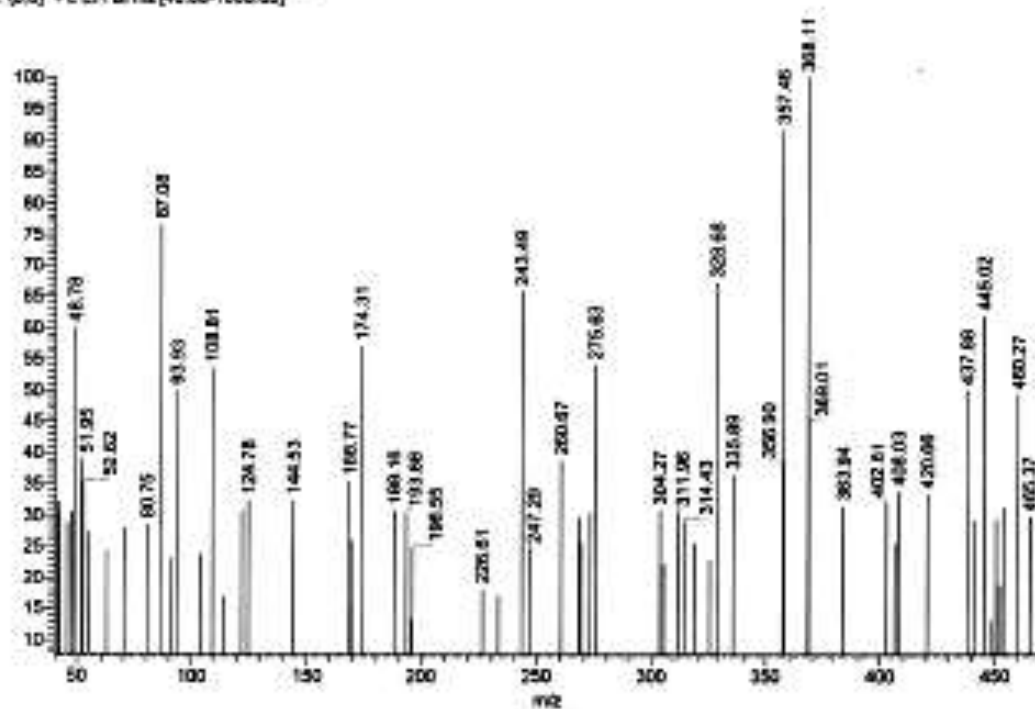

# Compound 9f

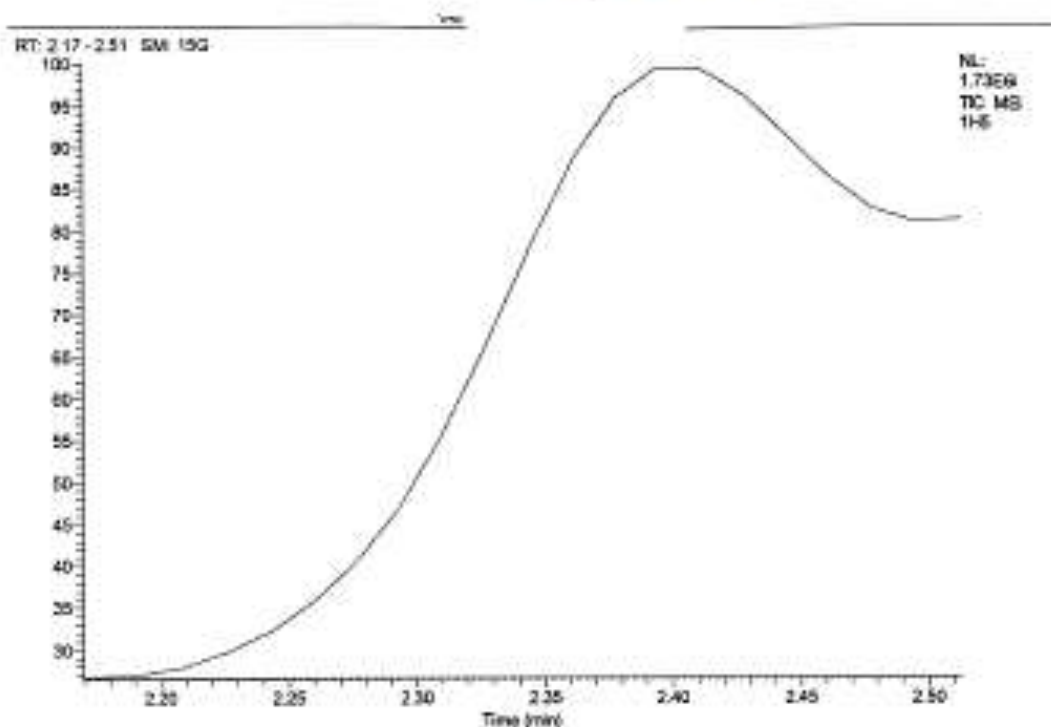

116 40234 RT: 3.03 AV: 1 SB: 14 3.80-3.87, 3.77-3.80 NL: 2.64E3  
T: (0.0) + c E) Full ms (40.00-1000.00)

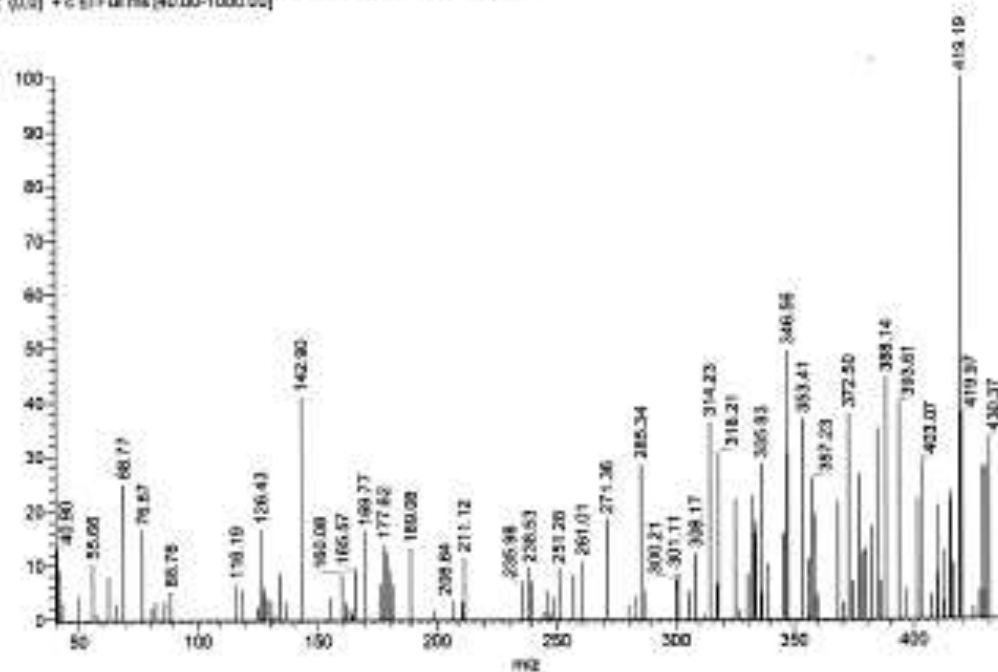

Supplement: Supplementary file 1 [file 18666629]
